# Supplementary material for: Kcnq1ot1/miR-381-3p/ETS2 Axis Regulates Inflammation in Mouse Models of Acute Respiratory Distress Syndrome
Source: PubMed Central journal article supplement — Mol Ther Nucleic Acids. 2019 Nov 13;19:179–89. doi: 10.1016/j.omtn.2019.10.036 (PMC6920288; doi:10.1016/j.omtn.2019.10.036), 2019-11-13
Supplement: mmc1.pdf [file mmc1.pdf]

OMTN, Volume 19

## **Supplemental Information**

**Kcnq1ot1/miR-381-3p/ETS2 Axis Regulates**

**Inflammation in Mouse Models of Acute**

**Respiratory Distress Syndrome**

**Xiaohui Jiang, Meihong Yu, Taiping Zhu, Lulu Lou, Xu Chen, Qian Li, Danhong Wei, and Renhua Sun**

**Supplementary Table 1.** The differential analysis results of allgenes

| logFC    | AveExpr      | t           | p. Value     | adj.p.Val | B        |             |
|----------|--------------|-------------|--------------|-----------|----------|-------------|
| ETS2     | 1.552580906  | 7.679311155 | 14.0513358   | 3.84E-13  | 5.22E-09 | 19.63873215 |
| CDK5RAP2 | 2.251367569  | 9.157797722 | 13.85036019  | 5.25E-13  | 5.22E-09 | 19.35967902 |
| GRB10    | 2.676412417  | 8.210899219 | 13.48869855  | 9.28E-13  | 5.22E-09 | 18.84703325 |
| CD177    | 3.894762431  | 11.29034042 | 13.46425107  | 9.64E-13  | 5.22E-09 | 18.81188505 |
| GYG1     | 2.08718041   | 10.47582225 | 13.19433405  | 1.49E-12  | 6.45E-09 | 18.41958226 |
| P2RY10   | -1.369432045 | 5.778241085 | -12.85788829 | 2.58E-12  | 9.31E-09 | 17.91949293 |
| IRAK3    | 2.283897424  | 9.287247816 | 12.54237783  | 4.37E-12  | 1.35E-08 | 17.43903951 |
| UPP1     | 1.251842917  | 13.18386306 | 12.14572019  | 8.58E-12  | 2.32E-08 | 16.81877606 |
| ZDHHC20  | 1.893601573  | 6.979373071 | 11.8106408   | 1.54E-11  | 3.48E-08 | 16.2802938  |
| BTBD11   | -1.249885455 | 5.508767245 | -11.78563274 | 1.61E-11  | 3.48E-08 | 16.23956117 |
| MCEMP1   | 1.80846951   | 12.37926579 | 11.67186386  | 1.97E-11  | 3.87E-08 | 16.05329084 |
| MAPK14   | 1.357129639  | 10.6680844  | 10.88942309  | 8.14E-11  | 1.47E-07 | 14.72828621 |
| HLTF     | 2.497239851  | 7.162810981 | 10.72292997  | 1.11E-10  | 1.85E-07 | 14.43617587 |
| MYBPH    | -1.315421286 | 7.039624685 | -10.50538689 | 1.68E-10  | 2.51E-07 | 14.04897141 |
| EXOSC4   | 1.715363243  | 9.982438778 | 10.48699722  | 1.74E-10  | 2.51E-07 | 14.01594998 |
| NLRC4    | 1.022665451  | 7.631234458 | 10.12363167  | 3.51E-10  | 4.47E-07 | 13.35408957 |
| VNN1     | 2.344156465  | 9.098535753 | 9.993039545  | 4.53E-10  | 5.45E-07 | 13.11180998 |
| SLC25A45 | -1.047842806 | 7.673991622 | -9.959747473 | 4.84E-10  | 5.51E-07 | 13.04966837 |
| GADD45A  | 1.928097865  | 10.1988178  | 9.913055763  | 5.30E-10  | 5.74E-07 | 12.96225657 |
| MTHFD2   | 1.191611014  | 7.84827399  | 9.824621486  | 6.32E-10  | 6.22E-07 | 12.79586707 |
| NOV      | -1.20153325  | 5.437281729 | -9.754043035 | 7.28E-10  | 6.85E-07 | 12.66228988 |
| AGFG1    | 1.640278139  | 9.350338198 | 9.581717728  | 1.03E-09  | 9.28E-07 | 12.33320718 |
| PECR     | 1.049434944  | 7.447300132 | 9.483437568  | 1.26E-09  | 1.09E-06 | 12.14364805 |
| MAP7     | -1.558343962 | 5.991078214 | -9.370332664 | 1.58E-09  | 1.32E-06 | 11.92379793 |
| STOM     | 1.605393993  | 8.003100851 | 9.14836773   | 2.50E-09  | 2.00E-06 | 11.48703704 |
| TDRD9    | 3.493719906  | 8.058648658 | 9.105257589  | 2.73E-09  | 2.11E-06 | 11.4013892  |
| SMARCD3  | 1.022370653  | 8.845440295 | 9.087939867  | 2.83E-09  | 2.12E-06 | 11.36690839 |

|              |              |             |              |          |          |             |
|--------------|--------------|-------------|--------------|----------|----------|-------------|
| PCMT1        | 1.030177986  | 10.06286801 | 9.034275719  | 3.17E-09 | 2.29E-06 | 11.2597848  |
| LHX4         | 1.303179406  | 6.559325637 | 8.997506066  | 3.42E-09 | 2.39E-06 | 11.18614591 |
| IL1R2        | 1.064284646  | 12.19333476 | 8.924208765  | 3.99E-09 | 2.62E-06 | 11.03877    |
| CEBPA        | 1.21352408   | 8.635365238 | 8.912001827  | 4.10E-09 | 2.62E-06 | 11.01415053 |
| GRINA        | 1.207995139  | 11.57778369 | 8.910104508  | 4.11E-09 | 2.62E-06 | 11.010322   |
| PLEKHO1      | -2.007154007 | 10.47307762 | -8.845949944 | 4.71E-09 | 2.70E-06 | 10.88056008 |
| HSH2D        | -1.786235479 | 8.692095826 | -8.830030482 | 4.87E-09 | 2.70E-06 | 10.84826831 |
| CD44         | 1.102242986  | 7.795070049 | 8.779111719  | 5.42E-09 | 2.94E-06 | 10.74473558 |
| TLR5         | 1.939188771  | 10.14244174 | 8.749919147  | 5.77E-09 | 3.05E-06 | 10.68520888 |
| RP1-193H18.2 | 2.040529069  | 6.763274764 | 8.697257751  | 6.46E-09 | 3.08E-06 | 10.57751385 |
| SRPK1        | 1.421093535  | 9.308777663 | 8.690598571  | 6.55E-09 | 3.08E-06 | 10.56386682 |
| CYP1B1       | 2.347968035  | 7.156156208 | 8.616008163  | 7.68E-09 | 3.51E-06 | 10.41056415 |
| IDNK         | 1.753171212  | 8.689818411 | 8.577557084  | 8.34E-09 | 3.69E-06 | 10.33122119 |
| IL18R1       | 2.696613865  | 9.183402655 | 8.522913405  | 9.39E-09 | 4.07E-06 | 10.21809515 |
| AK025288     | 1.355238108  | 10.40626991 | 8.456899439  | 1.08E-08 | 4.60E-06 | 10.08085032 |
| SORT1        | 1.106631243  | 8.117531892 | 8.422121584  | 1.17E-08 | 4.86E-06 | 10.00829116 |
| TPST2        | 1.277946927  | 10.82268172 | 8.40910711   | 1.20E-08 | 4.91E-06 | 9.981093017 |
| FKBP5        | 2.124480649  | 8.012705793 | 8.372818973  | 1.30E-08 | 5.03E-06 | 9.905126519 |
| TRPM2        | 1.848831934  | 7.752551764 | 8.361277571  | 1.33E-08 | 5.06E-06 | 9.880925299 |
| MAP2K6       | 1.317446569  | 7.06605542  | 8.304071479  | 1.51E-08 | 5.64E-06 | 9.760683539 |
| ARG1         | 2.770833434  | 6.763545186 | 8.261371035  | 1.66E-08 | 6.02E-06 | 9.670621081 |
| RAB32        | 1.172583063  | 10.35276517 | 8.25899716   | 1.67E-08 | 6.02E-06 | 9.6656064   |
| TIGD3        | -2.301458009 | 9.096014506 | -8.241330935 | 1.73E-08 | 6.11E-06 | 9.628261737 |
| PKM          | 1.702982229  | 9.243544642 | 8.236870844  | 1.75E-08 | 6.11E-06 | 9.618826373 |
| GAS7         | 1.115072351  | 9.065113116 | 8.212743501  | 1.84E-08 | 6.15E-06 | 9.567734648 |
| RPGRIP1      | -2.59097149  | 8.800049203 | -8.194581999 | 1.92E-08 | 6.16E-06 | 9.529220324 |
| HS3ST3B1     | 1.066197177  | 5.355882373 | 8.059842028  | 2.59E-08 | 7.78E-06 | 9.24198834  |
| FUNDC1       | -1.318114049 | 6.419590108 | -8.031529523 | 2.75E-08 | 8.06E-06 | 9.181298671 |
| MEF2C        | -1.242135531 | 6.78695513  | -7.981919455 | 3.08E-08 | 8.86E-06 | 9.074676747 |

|              |              |             |              |          |          |             |
|--------------|--------------|-------------|--------------|----------|----------|-------------|
| METTL9       | 1.181020646  | 10.81363439 | 7.976982049  | 3.11E-08 | 8.86E-06 | 9.064045817 |
| SNX3         | 1.397332583  | 9.526581667 | 7.923077306  | 3.51E-08 | 9.57E-06 | 8.947752404 |
| CSF1R        | -2.071697238 | 8.447566044 | -7.920979265 | 3.52E-08 | 9.57E-06 | 8.943217642 |
| MPEG1        | -1.691594469 | 10.30212074 | -7.914167106 | 3.58E-08 | 9.57E-06 | 8.92848929  |
| ATP11B       | 1.263621955  | 7.972400964 | 7.844461486  | 4.18E-08 | 1.10E-05 | 8.777397024 |
| CCDC146      | -1.467166406 | 6.875479571 | -7.837448852 | 4.25E-08 | 1.10E-05 | 8.76215792  |
| LOC102723526 | -1.397073719 | 8.628917144 | -7.818336537 | 4.44E-08 | 1.12E-05 | 8.720589234 |
| KCNE1        | 1.621025337  | 6.818895783 | 7.801303472  | 4.61E-08 | 1.12E-05 | 8.683498677 |
| HP           | 2.204975601  | 9.934647786 | 7.795549698  | 4.67E-08 | 1.12E-05 | 8.670960077 |
| RP11-44F14.8 | -1.634831802 | 7.197646925 | -7.793855466 | 4.69E-08 | 1.12E-05 | 8.667267109 |
| CCDC153      | -1.312611438 | 8.903412243 | -7.771759386 | 4.93E-08 | 1.15E-05 | 8.619065962 |
| CYSLTR1      | -1.228330837 | 6.619906738 | -7.758041103 | 5.08E-08 | 1.17E-05 | 8.589105254 |
| SMA4         | 1.065295149  | 8.343198095 | 7.730242798  | 5.41E-08 | 1.22E-05 | 8.528311267 |
| PNMA6A       | -1.308113226 | 8.58399087  | -7.716627379 | 5.58E-08 | 1.23E-05 | 8.498494503 |
| LOC283588    | -1.517599292 | 6.915786552 | -7.706589089 | 5.71E-08 | 1.25E-05 | 8.47649444  |
| CDKN2C       | 1.182059278  | 7.756680639 | 7.692043582  | 5.90E-08 | 1.25E-05 | 8.444590792 |
| ASF1B        | -1.497122757 | 7.876277813 | -7.6170967   | 7.00E-08 | 1.40E-05 | 8.279727296 |
| RPS6KA5      | -1.300554861 | 7.004017194 | -7.603247779 | 7.22E-08 | 1.42E-05 | 8.24917596  |
| GALNT14      | 2.192178712  | 10.14068639 | 7.590803344  | 7.43E-08 | 1.43E-05 | 8.221699797 |
| CASS4        | -1.13683574  | 6.155957839 | -7.589069089 | 7.46E-08 | 1.43E-05 | 8.217868981 |
| HVCN1        | -2.216065608 | 9.722262283 | -7.584674482 | 7.54E-08 | 1.43E-05 | 8.208159774 |
| NAIP         | 1.767800049  | 8.960480708 | 7.517849679  | 8.78E-08 | 1.62E-05 | 8.060184397 |
| MS4A6A       | 1.076941493  | 9.273675476 | 7.473075058  | 9.73E-08 | 1.76E-05 | 7.960684417 |
| FOXC1        | 1.505446003  | 7.272335283 | 7.462127681  | 9.98E-08 | 1.79E-05 | 7.936313875 |
| GPX3         | -1.978061222 | 6.239807604 | -7.458575235 | 1.01E-07 | 1.79E-05 | 7.928401973 |
| SORD         | -1.385719743 | 7.447510583 | -7.453879143 | 1.02E-07 | 1.79E-05 | 7.917940264 |
| NHS          | -1.624115111 | 6.361414458 | -7.40769152  | 1.13E-07 | 1.96E-05 | 7.814881468 |
| SAMSN1       | 1.368990135  | 6.720713002 | 7.376880713  | 1.21E-07 | 2.09E-05 | 7.745967525 |
| SNRN25       | -1.482259155 | 8.45265499  | -7.363999467 | 1.25E-07 | 2.12E-05 | 7.717117123 |

|             |              |             |              |          |          |             |
|-------------|--------------|-------------|--------------|----------|----------|-------------|
| ARRB1       | -1.346908212 | 8.138001595 | -7.353020715 | 1.28E-07 | 2.15E-05 | 7.692509581 |
| CCR3        | -2.060902965 | 7.886530045 | -7.290906995 | 1.48E-07 | 2.41E-05 | 7.552974739 |
| PLAC8       | 2.399659531  | 10.55786074 | 7.259480108  | 1.59E-07 | 2.53E-05 | 7.482173201 |
| PAG1        | 1.550239372  | 9.880277852 | 7.257225006  | 1.60E-07 | 2.53E-05 | 7.477087464 |
| TBC1D8      | 2.320674431  | 7.797067531 | 7.223607139  | 1.73E-07 | 2.68E-05 | 7.401189275 |
| C9orf91     | -1.347242469 | 5.472976748 | -7.187395959 | 1.89E-07 | 2.82E-05 | 7.319263266 |
| ROGDI       | 1.317740531  | 8.609126866 | 7.11487307   | 2.23E-07 | 3.23E-05 | 7.154647531 |
| MAST4       | 1.37377666   | 6.766536997 | 7.074627041  | 2.46E-07 | 3.50E-05 | 7.062988624 |
| OPLAH       | 1.922216316  | 8.221221582 | 7.062011408  | 2.53E-07 | 3.56E-05 | 7.034212163 |
| ESYT1       | -1.600891344 | 9.931339839 | -7.049859216 | 2.60E-07 | 3.59E-05 | 7.006472664 |
| CLEC4D      | 1.817982434  | 10.11944442 | 7.026977663  | 2.75E-07 | 3.69E-05 | 6.95418796  |
| OLAH        | 2.669610814  | 6.233351442 | 6.99688036   | 2.95E-07 | 3.87E-05 | 6.885308966 |
| PPCDC       | -1.370550972 | 9.974888924 | -6.993165205 | 2.97E-07 | 3.87E-05 | 6.876798328 |
| BCAT1       | 1.877652031  | 6.579976217 | 6.991148556  | 2.99E-07 | 3.87E-05 | 6.872177845 |
| TSPAN13     | -1.904569099 | 4.761768756 | -6.976196078 | 3.10E-07 | 3.99E-05 | 6.837902393 |
| MSMO1       | 1.473571417  | 8.478056188 | 6.937400044  | 3.39E-07 | 4.27E-05 | 6.748832891 |
| BATF        | 1.72022774   | 9.405143807 | 6.91213347   | 3.60E-07 | 4.48E-05 | 6.690718488 |
| GPR162      | -2.015172653 | 8.856331118 | -6.902362924 | 3.69E-07 | 4.56E-05 | 6.668223332 |
| IDO1        | -1.983738747 | 6.269685113 | -6.894937079 | 3.75E-07 | 4.62E-05 | 6.651118146 |
| METTL7B     | 3.384873816  | 5.302268283 | 6.883406022  | 3.86E-07 | 4.66E-05 | 6.624542495 |
| ACBD6       | 1.544005962  | 8.616567845 | 6.810131069  | 4.59E-07 | 5.45E-05 | 6.455262811 |
| ALPL        | 1.007957865  | 6.90025829  | 6.808462587  | 4.61E-07 | 5.45E-05 | 6.451400227 |
| SULT1B1     | 1.477694997  | 8.454677432 | 6.802325159  | 4.68E-07 | 5.47E-05 | 6.437188829 |
| RSBN1       | 1.085503674  | 8.182393458 | 6.757418471  | 5.20E-07 | 5.89E-05 | 6.333059565 |
| PPIH        | -1.144883052 | 7.540876394 | -6.753992327 | 5.25E-07 | 5.89E-05 | 6.325104507 |
| MAP3K14     | -1.008328649 | 8.322623568 | -6.724255468 | 5.63E-07 | 6.17E-05 | 6.255996967 |
| ST3GAL4-AS1 | 1.507874767  | 10.0592043  | 6.71365009   | 5.78E-07 | 6.26E-05 | 6.23132339  |
| AKT1        | -1.188995747 | 7.175962512 | -6.576642438 | 8.03E-07 | 8.20E-05 | 5.911313138 |
| CARD6       | 1.219712507  | 11.23037446 | 6.559105774  | 8.38E-07 | 8.48E-05 | 5.870185937 |

|            |              |             |              |          |             |             |
|------------|--------------|-------------|--------------|----------|-------------|-------------|
| FGL2       | -1.228134979 | 10.81413755 | -6.544823334 | 8.67E-07 | 8.69E-05    | 5.836663033 |
| GPR84      | 2.831090476  | 7.27388796  | 6.53712103   | 8.83E-07 | 8.81E-05    | 5.818574411 |
| SEL1L3     | 1.313216573  | 5.959041495 | 6.529361867  | 9.00E-07 | 8.91E-05    | 5.800345028 |
| SLC37A3    | 1.486231266  | 7.340052793 | 6.52882512   | 9.01E-07 | 8.91E-05    | 5.799083728 |
| LOC154761  | 1.619126958  | 6.652815368 | 6.517338202  | 9.26E-07 | 9.09E-05    | 5.772082329 |
| ANXA3      | 1.230549087  | 11.59874066 | 6.500596702  | 9.65E-07 | 9.23E-05    | 5.732701088 |
| EMILIN2    | 1.070315566  | 8.199351148 | 6.499181116  | 9.68E-07 | 9.23E-05    | 5.729369653 |
| RP11-6I2.3 | 1.728935861  | 7.83577692  | 6.491871672  | 9.85E-07 | 9.36E-05    | 5.71216383  |
| MTRR       | 1.016453476  | 5.064315578 | 6.465808775  | 1.05E-06 | 9.83E-05    | 5.650762277 |
| CHI3L1     | -1.311494132 | 9.088324889 | -6.465397878 | 1.05E-06 | 9.83E-05    | 5.649793602 |
| ANKRD22    | 2.058144733  | 8.615873168 | 6.454062509  | 1.08E-06 | 0.00010035  | 5.623062999 |
| ZAK        | 1.06538609   | 7.181386347 | 6.387277728  | 1.27E-06 | 0.000115146 | 5.465268534 |
| BMX        | 1.351154601  | 8.406755918 | 6.371596279  | 1.32E-06 | 0.000117554 | 5.428142536 |
| FLVCR1     | -1.028950698 | 5.060523707 | -6.340894952 | 1.42E-06 | 0.000123556 | 5.355375268 |
| TP53INP2   | -1.247576045 | 8.604134259 | -6.325299988 | 1.48E-06 | 0.000125887 | 5.318371536 |
| GRAMD1C    | -1.105875646 | 5.723608674 | -6.309701047 | 1.53E-06 | 0.000129242 | 5.281330889 |
| KISS1R     | -1.396315458 | 8.382824392 | -6.283883839 | 1.63E-06 | 0.000134484 | 5.219966344 |
| F5         | 1.284286451  | 9.716898674 | 6.279413697  | 1.65E-06 | 0.000134484 | 5.209333775 |
| C19orf60   | -1.180430465 | 10.4375029  | -6.279320378 | 1.65E-06 | 0.000134484 | 5.209111784 |
| GPR114     | -1.169627434 | 6.228813575 | -6.254235657 | 1.76E-06 | 0.000139474 | 5.149404531 |
| ECHDC3     | 1.843985927  | 8.683360609 | 6.251405849  | 1.77E-06 | 0.000139474 | 5.142664594 |
| TGM3       | -1.826926823 | 7.436237207 | -6.250808077 | 1.77E-06 | 0.000139474 | 5.141240727 |
| PIWIL4     | 1.869455851  | 7.084017714 | 6.228944888  | 1.87E-06 | 0.000145553 | 5.089136697 |
| BRI3BP     | -1.01325038  | 6.260437994 | -6.216112293 | 1.93E-06 | 0.000148597 | 5.058529939 |
| ZDHHC19    | 2.093641646  | 7.742834528 | 6.199552765  | 2.01E-06 | 0.000153769 | 5.019007755 |
| LHX4-AS1   | 1.624543601  | 7.82032171  | 6.184027501  | 2.09E-06 | 0.000157398 | 4.98192717  |
| LGALS12    | -2.030165884 | 9.044259103 | -6.162365804 | 2.20E-06 | 0.000163152 | 4.930147194 |
| LOXL1      | 1.230336438  | 6.783268885 | 6.160118437  | 2.21E-06 | 0.000163356 | 4.924772242 |
| AIM2       | 1.983964333  | 9.708431906 | 6.12927506   | 2.39E-06 | 0.000172454 | 4.850951271 |

|            |              |             |              |          |             |             |
|------------|--------------|-------------|--------------|----------|-------------|-------------|
| EFEMP2     | 1.110838042  | 8.116915323 | 6.105568259  | 2.53E-06 | 0.000178439 | 4.794143318 |
| HIST1H2AE  | 1.398575448  | 8.537724575 | 6.065181442  | 2.79E-06 | 0.000193006 | 4.697231753 |
| PLP2       | 1.41059983   | 9.696493109 | 6.061482318  | 2.82E-06 | 0.00019383  | 4.688347054 |
| MEF2A      | 1.21882683   | 7.17551005  | 6.056180987  | 2.86E-06 | 0.000194561 | 4.675611693 |
| LOC93622   | -1.091139823 | 7.079885036 | -6.03156597  | 3.04E-06 | 0.000202295 | 4.616441981 |
| KLHL2      | 1.697774885  | 7.460725554 | 6.028133814  | 3.06E-06 | 0.000203391 | 4.608186914 |
| BACE2      | -1.825987712 | 6.377760682 | -6.024032409 | 3.09E-06 | 0.000204834 | 4.598320618 |
| TOMM40L    | 1.67117466   | 10.09341032 | 6.014178911  | 3.17E-06 | 0.000209241 | 4.574610296 |
| PPM1N      | 1.011979358  | 7.49299972  | 5.958008838  | 3.64E-06 | 0.00022966  | 4.439266607 |
| UBE2F      | 1.093580524  | 9.643630266 | 5.953287122  | 3.68E-06 | 0.00022966  | 4.427875497 |
| C16orf93   | -1.146427649 | 7.571527852 | -5.926746074 | 3.94E-06 | 0.000240722 | 4.363805672 |
| CSGALNACT2 | 1.123005444  | 5.907496326 | 5.908884094  | 4.11E-06 | 0.000246066 | 4.320649415 |
| SPNS3      | -1.946297472 | 8.393171653 | -5.905982271 | 4.14E-06 | 0.000247057 | 4.3136355   |
| TOPORS     | -1.199651036 | 6.505383878 | -5.905045257 | 4.15E-06 | 0.000247057 | 4.311370502 |
| GCH1       | 2.075280844  | 8.263894905 | 5.881404321  | 4.40E-06 | 0.000258443 | 4.254197362 |
| GALNT6     | -1.413983108 | 6.760282547 | -5.857865023 | 4.67E-06 | 0.000268198 | 4.197218802 |
| ITIH4      | 1.100833608  | 7.312845432 | 5.812389214  | 5.23E-06 | 0.000289578 | 4.086999303 |
| ZNF274     | -1.037132535 | 9.378614299 | -5.808382982 | 5.28E-06 | 0.000290993 | 4.077280581 |
| FAM174A    | -1.139654505 | 6.657216621 | -5.803601354 | 5.34E-06 | 0.000292249 | 4.065678977 |
| PFKFB3     | 1.245679729  | 11.98113828 | 5.788065908  | 5.56E-06 | 0.000299764 | 4.027971692 |
| LOC441081  | 1.382844059  | 8.025764019 | 5.775527897  | 5.73E-06 | 0.000304961 | 3.997524408 |
| SPINT1     | -1.167104135 | 7.687308512 | -5.767444516 | 5.85E-06 | 0.000308143 | 3.97788755  |
| SLC26A11   | 2.239407087  | 7.726082599 | 5.757289747  | 6.00E-06 | 0.00031376  | 3.953210762 |
| DPEP3      | -1.061999344 | 11.78444076 | -5.747511699 | 6.15E-06 | 0.000319056 | 3.929441142 |
| VWA5A      | 1.35482249   | 5.46431388  | 5.731198339  | 6.40E-06 | 0.000327754 | 3.889766772 |
| RTN1       | -1.138893611 | 5.66202417  | -5.710716014 | 6.74E-06 | 0.000341733 | 3.83992198  |
| EVL        | -1.24434574  | 8.491266582 | -5.699845304 | 6.92E-06 | 0.000346281 | 3.813453502 |
| SGSH       | 1.109333944  | 7.505057031 | 5.694055924  | 7.03E-06 | 0.000348115 | 3.799353331 |
| CLU        | 1.553201993  | 7.350488785 | 5.665931131  | 7.54E-06 | 0.000371795 | 3.730816251 |

|              |              |             |              |          |             |             |
|--------------|--------------|-------------|--------------|----------|-------------|-------------|
| FOLR3        | 1.035829319  | 11.47910462 | 5.647919697  | 7.88E-06 | 0.000383703 | 3.686891264 |
| ZNF211       | -1.240630219 | 7.617223203 | -5.63626108  | 8.12E-06 | 0.000393309 | 3.658445522 |
| DDAH2        | 1.252458142  | 9.788914776 | 5.615936169  | 8.54E-06 | 0.000405698 | 3.608829864 |
| RSPH9        | 1.646046819  | 8.047138222 | 5.601735926  | 8.85E-06 | 0.000415848 | 3.574146603 |
| FAIM3        | -1.205723865 | 8.281670366 | -5.592552031 | 9.06E-06 | 0.000423703 | 3.551707397 |
| TP53I3       | 1.824708486  | 9.011167253 | 5.57244898   | 9.53E-06 | 0.000439525 | 3.502567324 |
| IL5RA        | -1.187920837 | 6.457765512 | -5.569144388 | 9.61E-06 | 0.000439525 | 3.494486706 |
| ACER3        | 1.258536979  | 6.602938458 | 5.522909738  | 1.08E-05 | 0.000478485 | 3.381348171 |
| ZBTB42       | -1.139593743 | 6.390568785 | -5.516872472 | 1.10E-05 | 0.000483104 | 3.366563533 |
| LOC100507006 | -1.152671486 | 10.50229777 | -5.492637141 | 1.16E-05 | 0.000505416 | 3.307188476 |
| PNP          | 1.153432368  | 5.669717965 | 5.48937766   | 1.17E-05 | 0.00050783  | 3.299199902 |
| JPX          | -1.093480342 | 5.607526444 | -5.48753158  | 1.18E-05 | 0.00050783  | 3.29467508  |
| PAQR7        | -1.306004465 | 7.298812503 | -5.484502813 | 1.19E-05 | 0.000510256 | 3.287250941 |
| SRGAP2C      | -1.018428167 | 9.099048757 | -5.465031868 | 1.25E-05 | 0.000530059 | 3.239509039 |
| ZSCAN18      | -1.075014712 | 6.373737922 | -5.443055052 | 1.32E-05 | 0.000551092 | 3.185593067 |
| FBXO34       | 1.043333677  | 9.042678648 | 5.422081002  | 1.39E-05 | 0.000571509 | 3.134108432 |
| PSTPIP2      | 1.159495222  | 9.542421639 | 5.415923744  | 1.41E-05 | 0.00057837  | 3.11898909  |
| MCCC1        | -1.105795861 | 5.432476677 | -5.388179348 | 1.52E-05 | 0.00060881  | 3.050833057 |
| CYB561       | -1.033959601 | 7.539790589 | -5.375970665 | 1.56E-05 | 0.000620959 | 3.020826945 |
| DOK2         | -1.232142174 | 9.19801999  | -5.370950552 | 1.58E-05 | 0.000626583 | 3.008486128 |
| MYO10        | 1.178339785  | 5.565618632 | 5.347889403  | 1.68E-05 | 0.000651083 | 2.951776772 |
| HPGD         | 2.104699361  | 5.860994003 | 5.314433016  | 1.83E-05 | 0.000699779 | 2.869451552 |
| SLC51A       | 2.660664413  | 8.051533356 | 5.313118468  | 1.83E-05 | 0.00070087  | 2.866215633 |
| SLC47A1      | -1.235515602 | 5.149676815 | -5.306092312 | 1.86E-05 | 0.000709678 | 2.848918328 |
| LOC101928893 | -1.060655524 | 5.270087543 | -5.277672497 | 2.00E-05 | 0.000749435 | 2.778926757 |
| ZNF329       | -1.922226243 | 7.677020569 | -5.261865356 | 2.09E-05 | 0.000770725 | 2.739979519 |
| PIK3R6       | -1.395859146 | 7.537987837 | -5.237810752 | 2.22E-05 | 0.000802718 | 2.680687813 |
| CAMK1        | -1.051424535 | 6.658799979 | -5.219287846 | 2.32E-05 | 0.000834221 | 2.635012383 |
| NDC80        | -1.077050936 | 7.15880186  | -5.207558859 | 2.39E-05 | 0.000849653 | 2.606081869 |



|               |              |             |              |          |             |             |
|---------------|--------------|-------------|--------------|----------|-------------|-------------|
| CD81          | -1.511317792 | 9.603165063 | -5.198741111 | 2.45E-05 | 0.000863018 | 2.584328119 |
| CST7          | 1.338966875  | 12.50804474 | 5.197102417  | 2.46E-05 | 0.00086399  | 2.580285014 |
| MT1F          | 1.338595378  | 9.702668557 | 5.183395753  | 2.54E-05 | 0.000887935 | 2.546462388 |
| SLC26A8       | 1.70222651   | 8.801768526 | 5.16060872   | 2.70E-05 | 0.000922367 | 2.490215457 |
| BC045789      | 1.604687953  | 5.452536357 | 5.151985934  | 2.76E-05 | 0.000938153 | 2.46892566  |
| ARMC12        | 1.24661459   | 4.72723441  | 5.150825375  | 2.76E-05 | 0.000938153 | 2.466059996 |
| GPR183        | -1.759223101 | 6.801312894 | -5.132162129 | 2.90E-05 | 0.000964046 | 2.41996929  |
| MAP1LC3A      | -1.093740917 | 8.355369771 | -5.082088518 | 3.29E-05 | 0.001057507 | 2.296244226 |
| SGK1          | -1.395673753 | 10.96983341 | -5.024393387 | 3.81E-05 | 0.001179192 | 2.15358528  |
| SDC2          | -1.207009181 | 6.46237724  | -5.018301345 | 3.87E-05 | 0.001192508 | 2.138516219 |
| LINC00672     | 1.016115872  | 9.502773821 | 4.987153994  | 4.19E-05 | 0.001270061 | 2.061456097 |
| NQO2          | 1.083533563  | 10.41395315 | 4.985065617  | 4.21E-05 | 0.001273054 | 2.056288486 |
| LIPT1         | -1.035819578 | 5.214528286 | -4.963793698 | 4.45E-05 | 0.001321202 | 2.003646238 |
| TMEM119       | 1.423484542  | 7.97212649  | 4.943998665  | 4.68E-05 | 0.00137633  | 1.954650165 |
| PMAIP1        | -1.517308885 | 7.691259491 | -4.933680364 | 4.80E-05 | 0.00140181  | 1.929107557 |
| PDGFC         | 1.232829354  | 4.572118861 | 4.918958196  | 4.99E-05 | 0.001443495 | 1.892659987 |
| C5orf30       | 1.126603278  | 6.910125507 | 4.917265252  | 5.01E-05 | 0.001447004 | 1.888468538 |
| CFD           | -1.956554063 | 10.66385055 | -4.916958479 | 5.01E-05 | 0.001447004 | 1.887709014 |
| HBD           | 3.274106476  | 9.053062495 | 4.884223027  | 5.45E-05 | 0.001528555 | 1.806652605 |
| AOC3          | -1.263664333 | 7.159220566 | -4.87356712  | 5.60E-05 | 0.001552444 | 1.780264271 |
| FCGR1A        | 1.176945844  | 10.57721878 | 4.866041179  | 5.71E-05 | 0.001568168 | 1.761626178 |
| ST6GALNAC3    | 1.04163649   | 5.008631302 | 4.833379865  | 6.20E-05 | 0.001666372 | 1.680733349 |
| SPTSSA        | 1.266792052  | 5.019428901 | 4.831111922  | 6.24E-05 | 0.001669828 | 1.675115959 |
| HLA-DRA       | -2.11830424  | 7.684697418 | -4.830557984 | 6.25E-05 | 0.001670125 | 1.673743921 |
| P2RY2         | -1.615018733 | 7.039552682 | -4.815328734 | 6.49E-05 | 0.001723544 | 1.636022152 |
| NUP50-AS1     | -1.288552472 | 9.710421608 | -4.799031184 | 6.77E-05 | 0.001781467 | 1.595652895 |
| LINC00877     | -1.548724274 | 8.823252234 | -4.79076795  | 6.91E-05 | 0.001810265 | 1.575184357 |
| DSC2          | 1.23042076   | 8.106242696 | 4.774335132  | 7.21E-05 | 0.00186343  | 1.534478776 |
| RP11-334C17.5 | 1.957320536  | 9.45673276  | 4.764820654  | 7.39E-05 | 0.001897926 | 1.510910426 |

|               |              |             |              |             |             |             |
|---------------|--------------|-------------|--------------|-------------|-------------|-------------|
| C11orf96      | 1.41893891   | 6.42994133  | 4.759980797  | 7.48E-05    | 0.001910196 | 1.498921601 |
| ALOX15        | -1.404111747 | 6.991797446 | -4.71415946  | 8.41E-05    | 0.00206016  | 1.385420329 |
| SLC2A1        | 1.002094326  | 5.879970448 | 4.71162586   | 8.46E-05    | 0.002066235 | 1.379144783 |
| HLA-DPA1      | -1.35108949  | 7.263835873 | -4.697257296 | 8.78E-05    | 0.00211722  | 1.343555728 |
| FAM20A        | 1.48413549   | 4.963360269 | 4.694394447  | 8.84E-05    | 0.002130387 | 1.336465018 |
| ARFIP1        | -1.254293844 | 8.433977161 | -4.689627176 | 8.95E-05    | 0.002144562 | 1.324657593 |
| PRSS33        | -2.722694476 | 11.70526342 | -4.666758202 | 9.49E-05    | 0.002221275 | 1.268019596 |
| CAPG          | 1.055752639  | 9.481783618 | 4.663623142  | 9.57E-05    | 0.00222779  | 1.260255667 |
| MCTP1         | 1.121572816  | 6.899682498 | 4.658920723  | 9.68E-05    | 0.002249876 | 1.24861043  |
| HLA-DPB1      | -1.28511476  | 7.266352196 | -4.633344968 | 0.00010337  | 0.002348029 | 1.185279082 |
| SLC16A14      | -1.169246181 | 4.831411823 | -4.633224064 | 0.000103402 | 0.002348029 | 1.184979722 |
| ZNF266        | -1.234895271 | 8.956354708 | -4.605277537 | 0.000111055 | 0.00248955  | 1.115790037 |
| RAB13         | 1.562075181  | 8.014987844 | 4.584606471  | 0.000117079 | 0.002568736 | 1.064622605 |
| MIAT          | 1.631144653  | 8.944995295 | 4.578433786  | 0.00011894  | 0.00259642  | 1.049345056 |
| EBLN2         | 1.172363915  | 7.746163893 | 4.560152599  | 0.000124628 | 0.002693431 | 1.004103957 |
| MLK7-AS1      | 1.099464531  | 5.09078696  | 4.557468756  | 0.000125486 | 0.00270387  | 0.997462854 |
| ERCC1         | -1.538162385 | 8.316919918 | -4.524003908 | 0.000136688 | 0.002904782 | 0.914671389 |
| BTN3A1        | -1.006822938 | 9.617281299 | -4.521995314 | 0.000137391 | 0.002914009 | 0.909703188 |
| FLVCR1-AS1    | -1.513876479 | 8.170009333 | -4.520039689 | 0.000138079 | 0.002918577 | 0.904866126 |
| HLA-DMB       | -1.705614497 | 10.05440596 | -4.508859331 | 0.000142081 | 0.002966977 | 0.877214812 |
| HPSE          | 1.278520403  | 8.472580944 | 4.49788377   | 0.000146121 | 0.003019328 | 0.850073928 |
| TRIM22        | 1.175861373  | 8.114354815 | 4.494535581  | 0.000147377 | 0.003036575 | 0.841795171 |
| RPH3A         | 2.248691208  | 6.088125986 | 4.475787692  | 0.000154607 | 0.003152565 | 0.795446237 |
| FBXO6         | 1.25680741   | 9.135033917 | 4.442741     | 0.000168226 | 0.003354791 | 0.713779544 |
| GAFA1         | 1.215593951  | 4.518427858 | 4.440779559  | 0.000169071 | 0.003362016 | 0.708933699 |
| LOC101060510  | 1.06679116   | 9.594804368 | 4.436109184  | 0.0001711   | 0.003386814 | 0.697395938 |
| ITGA7         | 1.412096014  | 5.9027015   | 4.431626237  | 0.000173071 | 0.00341708  | 0.686322068 |
| RP11-499E18.1 | 1.377474316  | 5.215093696 | 4.430360634  | 0.000173631 | 0.003421273 | 0.683195904 |
| RP11-426C22.5 | -1.039489337 | 8.31254147  | -4.407914404 | 0.000183876 | 0.003555204 | 0.627763245 |

|              |              |             |              |             |             |              |
|--------------|--------------|-------------|--------------|-------------|-------------|--------------|
| LOC100505564 | -1.384649826 | 6.421985167 | -4.378063505 | 0.00019844  | 0.003741436 | 0.554080573  |
| CKS2         | -1.422255208 | 7.200648476 | -4.360807408 | 0.000207377 | 0.003871344 | 0.51150666   |
| MS4A4A       | 1.080010257  | 4.812928299 | 4.35195933   | 0.000212115 | 0.003916948 | 0.489682927  |
| OR52K3P      | -1.048932559 | 9.408156634 | -4.351854052 | 0.000212172 | 0.003916948 | 0.489423285  |
| CD52         | -1.507658906 | 10.08510013 | -4.340835012 | 0.000218224 | 0.00400139  | 0.462250907  |
| LCN2         | 1.843292931  | 11.16884097 | 4.316872537  | 0.000231986 | 0.004196866 | 0.403184417  |
| CYSLTR2      | -1.384067406 | 5.162432953 | -4.299411346 | 0.000242555 | 0.004348112 | 0.360164719  |
| FBP1         | -1.000170714 | 8.274851832 | -4.258067272 | 0.000269529 | 0.004710771 | 0.25838098   |
| MAP4K1       | -1.203078396 | 8.043383747 | -4.255500447 | 0.000271299 | 0.004737879 | 0.252065535  |
| SPAG1        | -1.028546184 | 6.01089795  | -4.243687903 | 0.000279593 | 0.004839425 | 0.223007699  |
| SLC25A38     | -1.144666144 | 6.254829183 | -4.233934077 | 0.000286632 | 0.00493796  | 0.19902155   |
| ALAS2        | 1.147026674  | 5.408848378 | 4.220513302  | 0.000296606 | 0.005070425 | 0.166029063  |
| CXCL8        | -1.790656979 | 9.926020014 | -4.220128522 | 0.000296897 | 0.005070425 | 0.165083347  |
| RP11-36B6.1  | 1.729248276  | 6.631389381 | 4.201372591  | 0.00031143  | 0.005227915 | 0.118998404  |
| RARRES3      | -1.282646309 | 10.54835238 | -4.196750511 | 0.000315118 | 0.005261285 | 0.107645689  |
| MAOA         | 2.428365368  | 5.810126962 | 4.184754185  | 0.000324896 | 0.005380399 | 0.078188223  |
| ACSF2        | -1.011182568 | 8.006849841 | -4.160192883 | 0.000345863 | 0.005631328 | 0.017913125  |
| TPST1        | 1.184101806  | 9.188023417 | 4.127787915  | 0.000375594 | 0.005967344 | -0.061533054 |
| PTGS2        | -1.184635844 | 6.0010037   | -4.094392152 | 0.000408887 | 0.006370102 | -0.14331031  |
| MMP8         | 1.200728858  | 4.711628842 | 4.087695864  | 0.000415906 | 0.006446994 | -0.159695209 |
| POMZP3       | -1.329635738 | 6.964538124 | -4.080401953 | 0.000423688 | 0.006544201 | -0.17753752  |
| GDPD5        | -1.483309264 | 7.301160063 | -4.053161006 | 0.000454049 | 0.006871017 | -0.24412794  |
| CLEC1B       | 1.462527267  | 8.257723161 | 4.05122114   | 0.000456291 | 0.006880908 | -0.2488671   |
| RGL4         | 1.10344716   | 9.041920826 | 4.040507334  | 0.000468875 | 0.007031548 | -0.275034355 |
| LAMP3        | -1.172022241 | 5.391794655 | -3.999224176 | 0.000520657 | 0.007592476 | -0.375750432 |
| CD69         | -1.40815683  | 5.378339609 | -3.996866195 | 0.00052378  | 0.007612383 | -0.381497464 |
| ACRC         | 1.065677302  | 7.914979429 | 3.994612998  | 0.000526781 | 0.007625297 | -0.38698853  |
| GSAP         | 1.025572813  | 6.085051458 | 3.975344252  | 0.000553152 | 0.007901384 | -0.433923285 |
| DMTN         | 1.215397656  | 7.698727477 | 3.968818876  | 0.000562375 | 0.007991963 | -0.449808143 |

|              |              |             |              |             |             |              |
|--------------|--------------|-------------|--------------|-------------|-------------|--------------|
| DPY19L3      | 1.165107052  | 7.396269769 | 3.957261514  | 0.000579084 | 0.008169424 | -0.477930275 |
| IL18RAP      | 1.812051354  | 9.076649389 | 3.954198247  | 0.000583595 | 0.008206324 | -0.485381377 |
| AHSP         | 3.292171868  | 7.098034615 | 3.94058322   | 0.000604065 | 0.008416923 | -0.518485034 |
| BTN3A2       | -1.30170241  | 8.787640302 | -3.921359489 | 0.000634182 | 0.008725036 | -0.565187285 |
| ANKRD55      | 1.643664906  | 8.330241602 | 3.89973876   | 0.000669827 | 0.009071356 | -0.617657587 |
| MXRA7        | 1.010139038  | 6.410520106 | 3.892823579  | 0.000681639 | 0.009166754 | -0.634427076 |
| TRBC1        | -1.861846559 | 8.450135054 | -3.878235946 | 0.000707236 | 0.009453826 | -0.669781968 |
| ZNF600       | -1.392663714 | 6.321688268 | -3.876962402 | 0.000709515 | 0.009472598 | -0.672867223 |
| SELENBP1     | 1.594465189  | 7.665715412 | 3.872463536  | 0.000717625 | 0.009504686 | -0.683764326 |
| NTSR1        | 1.039489998  | 6.291613008 | 3.871051082  | 0.000720189 | 0.009532787 | -0.687184996 |
| LOC100506922 | -1.471170934 | 7.738120356 | -3.859332478 | 0.00074182  | 0.009753561 | -0.71555466  |
| PPFIBP2      | -1.017365769 | 7.742378803 | -3.857095412 | 0.000746022 | 0.009790968 | -0.720968272 |
| TRMT6        | 1.047580271  | 6.196495354 | 3.844052617  | 0.000770988 | 0.01001545  | -0.752517619 |
| AKR1C3       | 1.323293274  | 5.793567137 | 3.795782205  | 0.000870756 | 0.010924809 | -0.869069984 |
| EPB42        | 2.261607512  | 6.342388918 | 3.795287079  | 0.000871842 | 0.010932107 | -0.870263747 |
| RASGRP1      | -1.209546208 | 6.933565767 | -3.738638138 | 0.001005372 | 0.01210191  | -1.006599354 |
| ASGR2        | 1.174006049  | 8.107733198 | 3.719460956  | 0.001054978 | 0.012559406 | -1.052638285 |
| LOC101929002 | -1.206346389 | 5.89989934  | -3.71496513  | 0.001066951 | 0.012640162 | -1.06342283  |
| SLC4A1       | 1.163874045  | 5.976672342 | 3.658033875  | 0.001230603 | 0.013974147 | -1.199695324 |
| LOC100506047 | -1.068736411 | 7.270379937 | -3.652606464 | 0.001247432 | 0.01409872  | -1.212657365 |
| ITGB3BP      | 1.229293514  | 6.893481764 | 3.582170772  | 0.001487394 | 0.016080635 | -1.380390645 |
| HBM          | 1.117417969  | 7.19559696  | 3.575205614  | 0.001513443 | 0.016300413 | -1.396926744 |
| AP3B2        | 1.142434788  | 5.419938116 | 3.56333597   | 0.001558867 | 0.016637394 | -1.425085025 |
| IFIT3        | -1.310691531 | 11.06038052 | -3.562175082 | 0.001563381 | 0.016669134 | -1.427837517 |
| OLFM4        | 1.696751552  | 6.771425314 | 3.513214446  | 0.001765812 | 0.018182914 | -1.543679508 |
| NGFRAP1      | 1.24650325   | 6.994994705 | 3.501059747  | 0.001819904 | 0.018575096 | -1.572362039 |
| COQ3         | 1.064221806  | 6.449447483 | 3.443587159  | 0.002098341 | 0.02050522  | -1.707559757 |
| MADCAM1      | -1.102301356 | 6.960196706 | -3.442563249 | 0.002103659 | 0.020547923 | -1.709961865 |
| GJB6         | 1.188508559  | 8.562202394 | 3.417624396  | 0.002237335 | 0.021485359 | -1.768396199 |

|             |              |             |              |             |             |              |
|-------------|--------------|-------------|--------------|-------------|-------------|--------------|
| CCNA1       | 1.161441372  | 4.84647178  | 3.404045473  | 0.002313557 | 0.022022015 | -1.800153645 |
| SEMG1       | -1.397481226 | 7.840475793 | -3.384630808 | 0.002426939 | 0.022840224 | -1.84548518  |
| IFIT2       | -1.064038573 | 10.13739285 | -3.383703588 | 0.002432487 | 0.022882492 | -1.84764795  |
| LSM7        | -1.480447514 | 10.07027932 | -3.36743167  | 0.002531877 | 0.023513276 | -1.885569566 |
| C19orf33    | 1.394014814  | 7.674240678 | 3.366339628  | 0.002538687 | 0.023541541 | -1.888112304 |
| DTX4        | -1.015321052 | 8.180553016 | -3.336907634 | 0.002729062 | 0.024872824 | -1.956533861 |
| HLA-DMA     | -1.090090604 | 8.316509896 | -3.335046317 | 0.002741556 | 0.024944703 | -1.960853811 |
| KLRB1       | -1.504819941 | 6.870379894 | -3.332966509 | 0.002755583 | 0.025016398 | -1.965679844 |
| GNLY        | -1.826884135 | 8.210322325 | -3.273915407 | 0.003184159 | 0.027794675 | -2.102248633 |
| MAFB        | 1.323873903  | 10.31065789 | 3.264947397  | 0.003254648 | 0.028200051 | -2.122910615 |
| CLC         | -1.018965872 | 12.95097266 | -3.263016236 | 0.003270024 | 0.028269296 | -2.127357173 |
| CD3D        | -1.372322604 | 8.564181344 | -3.233619523 | 0.003512926 | 0.029646301 | -2.194921407 |
| PTPRCAP     | -1.012169837 | 8.041890443 | -3.231142138 | 0.003534175 | 0.029779203 | -2.200604709 |
| CLEC5A      | 1.01443976   | 6.973002493 | 3.209473993  | 0.003725392 | 0.030989382 | -2.250241499 |
| LTF         | 1.569519017  | 9.608054714 | 3.206828531  | 0.003749411 | 0.031107737 | -2.256292791 |
| TNNT1       | -1.06966026  | 7.10313987  | -3.206282884 | 0.003754383 | 0.031107737 | -2.257540674 |
| BTN3A3      | -1.332756576 | 7.11950608  | -3.205496471 | 0.003761561 | 0.031125951 | -2.25933904  |
| DAAM2       | 1.150456521  | 6.273455493 | 3.204829617  | 0.003767658 | 0.031164494 | -2.260863862 |
| BTNL8       | -1.297375153 | 9.560114545 | -3.14429466  | 0.004362665 | 0.034466805 | -2.398758142 |
| FGF13       | 1.739393726  | 7.510869561 | 3.142485136  | 0.004381776 | 0.03457994  | -2.402863841 |
| ORM1        | 1.283947896  | 10.797807   | 3.139677882  | 0.004411583 | 0.03474899  | -2.409231427 |
| C3AR1       | 1.078753858  | 11.34100564 | 3.131197542  | 0.004502817 | 0.035263116 | -2.428452936 |
| LINC00189   | -1.302669684 | 7.460767408 | -3.129941827 | 0.00451648  | 0.035282963 | -2.431297328 |
| NR4A2       | -1.026357479 | 7.73112175  | -3.114075446 | 0.004692584 | 0.036331035 | -2.467196664 |
| CCL23       | -1.649769684 | 7.401182273 | -3.057715835 | 0.005373022 | 0.039983777 | -2.594096803 |
| RP1-93H18.6 | -1.021356556 | 9.546662222 | -3.055602591 | 0.005400293 | 0.040062493 | -2.598835823 |
| DEFA4       | 1.560575552  | 10.56054672 | 2.972401366  | 0.006585831 | 0.046034915 | -2.784271559 |
| IFIT1       | -1.524558601 | 8.914272911 | -2.961278524 | 0.006762022 | 0.04691816  | -2.808887966 |
| PPBP        | 1.653019349  | 10.46043729 | 2.948178785  | 0.006975297 | 0.047977982 | -2.837825471 |

|          |              |             |              |             |             |              |
|----------|--------------|-------------|--------------|-------------|-------------|--------------|
| FLJ12120 | -1.05853354  | 5.942161004 | -2.938400029 | 0.00713867  | 0.048750521 | -2.859388431 |
| HDC      | -1.378936955 | 7.725439547 | -2.924718939 | 0.007373371 | 0.049726049 | -2.889500679 |
| ETV7     | -1.236050486 | 7.753844427 | -2.923060609 | 0.007402314 | 0.049870076 | -2.893146242 |
| CD2      | -1.24208624  | 6.604701873 | -2.898650411 | 0.007841071 | 0.051644291 | -2.946695775 |
| FGFBP2   | -1.467401503 | 6.340752648 | -2.838227909 | 0.009035946 | 0.056997789 | -3.07832272  |
| DQ592442 | -1.087127031 | 6.451895974 | -2.829631584 | 0.009219369 | 0.057710171 | -3.096939841 |
| CRISP3   | 1.386476819  | 8.219015934 | 2.81141175   | 0.009619862 | 0.059451517 | -3.136306561 |
| RNASE6   | -1.094632476 | 9.546624158 | -2.785794455 | 0.010210897 | 0.06170237  | -3.191442209 |
| TUBB2A   | 1.38247584   | 6.635831438 | 2.740703408  | 0.011335449 | 0.066432786 | -3.287868987 |
| CD24     | 1.036440135  | 8.525270484 | 2.705335655  | 0.012298187 | 0.070337955 | -3.362933448 |
| ALOX12   | 1.050934917  | 5.380955028 | 2.629260131  | 0.014635571 | 0.079461912 | -3.52263768  |
| TGFBI    | -1.027140271 | 8.129899538 | -2.585212879 | 0.016172871 | 0.085420372 | -3.613968784 |
| GZMB     | -1.90247326  | 7.826150783 | -2.533129396 | 0.018184797 | 0.092056326 | -3.720845644 |
| CEACAM6  | 1.153722569  | 6.634867108 | 2.517779421  | 0.018820774 | 0.093973682 | -3.752107661 |
| VSIG4    | 1.194810444  | 5.672745236 | 2.479085142  | 0.020516746 | 0.099344536 | -3.8304242   |
| SERPING1 | -1.33748584  | 8.712587028 | -2.420436214 | 0.023358771 | 0.108408527 | -3.947762176 |
| MPO      | 1.103564889  | 7.080447497 | 2.381754573  | 0.025427419 | 0.114535497 | -4.024225359 |
| PF4      | 1.257779316  | 9.542825036 | 2.353238344  | 0.027058853 | 0.119337627 | -4.080110614 |
| GZMA     | -1.144321337 | 6.246992356 | -2.32993047  | 0.028463005 | 0.122904562 | -4.125478328 |
| HERC5    | -1.002460615 | 7.794289314 | -2.262705484 | 0.032894233 | 0.135913873 | -4.25472834  |
| FAM3B    | -1.69053221  | 7.801418053 | -2.11070991  | 0.045305966 | 0.168284854 | -4.537789986 |

**Supplementary Table 2.** The predicted results from DIANA and TargetScan databases

| miRNA                | PositionintheUTR | seedmatch | context++score | context++scorepercent | weightedcontext+ | conservedbranchle | Pct  |
|----------------------|------------------|-----------|----------------|-----------------------|------------------|-------------------|------|
|                      |                  |           |                | ile                   | +score           | ngth              |      |
| Conservedsites       |                  |           |                |                       |                  |                   |      |
| mmu-miR-203-3p.1     | 423-429          | 7mer-m8   | -0.02          | 64                    | -0.02            | 6.114             | 0.31 |
| mmu-miR-203-3p.2     | 423-429          | 7mer-1A   | -0.02          | 50                    | -0.02            | 6.114             | 0.23 |
| mmu-miR-539-3p       | 504-510          | 7mer-1A   | -0.11          | 90                    | -0.11            | 4.238             | N/A  |
| mmu-miR-381-3p       | 504-510          | 7mer-1A   | -0.07          | 85                    | -0.07            | 4.238             | N/A  |
| mmu-miR-1928         | 1045-1052        | 8mer      | -0.36          | 96                    | -0.07            | 6.686             | 0.68 |
| mmu-miR-222-3p       | 1045-1052        | 8mer      | -0.36          | 96                    | -0.07            | 6.686             | 0.68 |
| mmu-miR-221-3p       | 1045-1052        | 8mer      | -0.36          | 96                    | -0.07            | 6.686             | 0.68 |
| mmu-miR-22-3p        | 1050-1056        | 7mer-1A   | -0.17          | 81                    | -0.03            | 7.973             | 0.54 |
| mmu-miR-455-3p.2     | 1062-1068        | 7mer-1A   | -0.11          | 79                    | -0.02            | 6.174             | 0.38 |
| mmu-miR-682          | 1062-1068        | 7mer-1A   | -0.09          | 76                    | -0.02            | 6.174             | 0.38 |
| mmu-miR-199a-5p      | 1077-1083        | 7mer-1A   | -0.28          | 93                    | -0.05            | 7.354             | 0.79 |
| mmu-miR-199b-5p      | 1077-1083        | 7mer-1A   | -0.28          | 93                    | -0.05            | 7.354             | 0.79 |
| mmu-miR-145b         | 1078-1084        | 7mer-1A   | -0.16          | 89                    | -0.03            | 7.18              | 0.95 |
| mmu-miR-145a-5p      | 1078-1084        | 7mer-1A   | -0.16          | 89                    | -0.03            | 7.18              | 0.95 |
| mmu-miR-320-3p       | 1108-1114        | 7mer-1A   | -0.06          | 73                    | -0.01            | 4.665             | N/A  |
| Poorlyconservedsites |                  |           |                |                       |                  |                   |      |
| mmu-miR-6361         | 17-24            | 8mer      | -0.19          | 83                    | -0.19            | 0.716             | <0.1 |
| mmu-miR-6369         | 17-24            | 8mer      | -0.19          | 83                    | -0.19            | 0.716             | <0.1 |
| mmu-miR-6410         | 17-24            | 8mer      | -0.19          | 82                    | -0.19            | 0.716             | <0.1 |
| mmu-miR-6413         | 17-24            | 8mer      | -0.18          | 80                    | -0.18            | 0.716             | <0.1 |
| mmu-miR-24-3p        | 17-24            | 8mer      | -0.18          | 80                    | -0.18            | 0.716             | <0.1 |
| mmu-miR-5124b        | 17-24            | 8mer      | -0.18          | 80                    | -0.18            | 0.716             | <0.1 |
| mmu-miR-3106-5p      | 18-24            | 7mer-1A   | -0.06          | 68                    | -0.06            | 0                 | N/A  |
| mmu-miR-149-5p       | 19-25            | 7mer-m8   | -0.14          | 82                    | -0.14            | 0.591             | N/A  |
| mmu-miR-7087-3p      | 20-26            | 7mer-m8   | -0.09          | 55                    | -0.09            | 0                 | N/A  |

|                  |       |               |       |     |       |       |      |
|------------------|-------|---------------|-------|-----|-------|-------|------|
| mmu-miR-7679-5p  | 21-27 | 7mer-m8       | -0.2  | 83  | -0.2  | 0     | N/A  |
| mmu-miR-7648-3p  | 22-28 | 7mer-m8       | -0.09 | 53  | -0.09 | 0     | N/A  |
| mmu-miR-6940-5p  | 22-28 | 7mer-m8       | -0.09 | 52  | -0.09 | 0     | N/A  |
| mmu-miR-762      | 22-28 | 7mer-m8       | -0.04 | 48  | -0.04 | 0     | N/A  |
| mmu-miR-7048-5p  | 23-29 | 7mer-m8       | -0.06 | 35  | -0.06 | 0     | N/A  |
| mmu-miR-185-3p   | 23-29 | 7mer-m8       | -0.04 | 25  | -0.04 | 0     | N/A  |
| mmu-miR-7083-5p  | 24-30 | 7mer-m8       | -0.16 | 57  | -0.16 | 0.113 | N/A  |
| mmu-miR-673-3p   | 25-31 | 7mer-m8       | -0.27 | 81  | -0.27 | 0     | N/A  |
| mmu-miR-7648-3p  | 27-38 | non-canonical | N/A   | N/A | N/A   | 0     | N/A  |
| mmu-miR-7648-3p  | 27-38 | non-canonical | N/A   | N/A | N/A   | 0     | N/A  |
| mmu-miR-5621-3p  | 30-36 | 7mer-1A       | -0.14 | 68  | -0.14 | 0     | N/A  |
| mmu-miR-296-5p   | 30-36 | 7mer-1A       | -0.1  | 57  | -0.1  | 0     | N/A  |
| mmu-miR-6379     | 34-40 | 7mer-1A       | -0.07 | 56  | -0.07 | 0     | N/A  |
| mmu-miR-455-3p.1 | 38-44 | 7mer-1A       | -0.09 | 73  | -0.09 | 1.304 | 0.21 |
| mmu-miR-7214-3p  | 38-44 | 7mer-m8       | -0.09 | 66  | -0.09 | 0     | N/A  |
| mmu-miR-201-5p   | 40-46 | 7mer-m8       | -0.04 | 60  | -0.04 | 0.113 | N/A  |
| mmu-miR-7687-3p  | 41-47 | 7mer-m8       | -0.1  | 77  | -0.1  | 0.41  | N/A  |
| mmu-miR-188-3p   | 45-51 | 7mer-1A       | -0.16 | 76  | -0.16 | 0.468 | N/A  |
| mmu-miR-1933-3p  | 56-62 | 7mer-1A       | -0.03 | 45  | -0.03 | 0     | N/A  |
| mmu-miR-6949-5p  | 63-69 | 7mer-m8       | -0.09 | 67  | -0.09 | 0     | N/A  |
| mmu-miR-7088-5p  | 64-70 | 7mer-m8       | -0.02 | 65  | -0.02 | 0     | N/A  |
| mmu-miR-3105-5p  | 67-73 | 7mer-m8       | -0.13 | 75  | -0.13 | 0     | N/A  |
| mmu-miR-3057-5p  | 70-77 | 8mer          | -0.38 | 97  | -0.38 | 0     | N/A  |
| mmu-miR-5130     | 70-76 | 7mer-1A       | -0.25 | 93  | -0.25 | 0     | N/A  |
| mmu-miR-6938-5p  | 70-76 | 7mer-1A       | -0.18 | 81  | -0.18 | 0     | N/A  |
| mmu-miR-9-5p     | 73-79 | 7mer-1A       | -0.11 | 78  | -0.11 | 0.375 | <0.1 |
| mmu-miR-193a-5p  | 76-83 | 8mer          | -0.42 | 97  | -0.42 | 0.338 | <0.1 |
| mmu-miR-3091-5p  | 78-84 | 7mer-m8       | -0.29 | 93  | -0.29 | 0     | N/A  |
| mmu-miR-3961     | 87-93 | 7mer-1A       | -0.17 | 73  | -0.17 | 0     | N/A  |



|                  |         |               |       |     |       |       |     |
|------------------|---------|---------------|-------|-----|-------|-------|-----|
| mmu-miR-18a-3p   | 88-94   | 7mer-m8       | -0.06 | 61  | -0.06 | 0.113 | N/A |
| mmu-miR-7069-3p  | 88-94   | 7mer-m8       | -0.05 | 58  | -0.05 | 0.113 | N/A |
| mmu-miR-7016-3p  | 90-96   | 7mer-1A       | -0.07 | 64  | -0.07 | 0.409 | N/A |
| mmu-miR-7239-5p  | 93-99   | 7mer-m8       | -0.02 | 40  | -0.02 | 0     | N/A |
| mmu-miR-3101-5p  | 96-102  | 7mer-m8       | -0.02 | 32  | -0.02 | 0     | N/A |
| mmu-miR-7087-3p  | 108-120 | non-canonical | N/A   | N/A | N/A   | 0     | N/A |
| mmu-miR-7087-3p  | 108-120 | non-canonical | N/A   | N/A | N/A   | 0     | N/A |
| mmu-miR-3473c    | 109-115 | 7mer-1A       | -0.1  | 70  | -0.1  | 0     | N/A |
| mmu-miR-7649-3p  | 109-115 | 7mer-1A       | -0.05 | 50  | -0.05 | 0     | N/A |
| mmu-miR-6975-3p  | 109-115 | 7mer-1A       | -0.01 | 29  | -0.01 | 0     | N/A |
| mmu-miR-7063-3p  | 111-117 | 7mer-m8       | -0.04 | 33  | -0.04 | 0     | N/A |
| mmu-miR-6973b-3p | 111-117 | 7mer-m8       | -0.04 | 33  | -0.04 | 0     | N/A |
| mmu-miR-760-3p   | 113-119 | 7mer-1A       | -0.07 | 48  | -0.07 | 0.113 | N/A |
| mmu-miR-7239-3p  | 113-119 | 7mer-1A       | -0.05 | 39  | -0.05 | 0.113 | N/A |
| mmu-miR-1291     | 113-119 | 7mer-m8       | -0.02 | 30  | -0.02 | 0     | N/A |
| mmu-miR-7029-3p  | 114-120 | 7mer-m8       | -0.14 | 80  | -0.14 | 0.113 | N/A |
| mmu-miR-546      | 116-123 | 8mer          | -0.43 | 97  | -0.43 | 0     | N/A |
| mmu-miR-6934-5p  | 117-123 | 7mer-1A       | -0.1  | 66  | -0.1  | 0     | N/A |
| mmu-miR-6952-5p  | 117-123 | 7mer-1A       | -0.05 | 46  | -0.05 | 0     | N/A |
| mmu-miR-6400     | 119-130 | non-canonical | N/A   | N/A | N/A   | 0     | N/A |
| mmu-miR-6400     | 119-130 | non-canonical | N/A   | N/A | N/A   | 0     | N/A |
| mmu-miR-7680-3p  | 121-127 | 7mer-m8       | -0.04 | 55  | -0.04 | 0     | N/A |
| mmu-miR-7663-5p  | 121-127 | 7mer-m8       | -0.02 | 53  | -0.02 | 0     | N/A |
| mmu-miR-210-5p   | 128-134 | 7mer-m8       | -0.09 | 61  | -0.09 | 0.468 | N/A |
| mmu-miR-6919-5p  | 130-136 | 7mer-m8       | -0.25 | 92  | -0.25 | 0.409 | N/A |
| mmu-miR-1668     | 132-138 | 7mer-m8       | -0.1  | 81  | -0.1  | 0     | N/A |
| mmu-miR-3544-5p  | 133-140 | 8mer          | -0.18 | 89  | -0.18 | 0     | N/A |
| mmu-miR-488-3p   | 134-140 | 7mer-m8       | -0.04 | 65  | -0.04 | 0.253 | N/A |
| mmu-miR-7681-3p  | 134-140 | 7mer-1A       | -0.04 | 58  | -0.04 | 0     | N/A |

|                  |         |               |       |     |       |       |      |
|------------------|---------|---------------|-------|-----|-------|-------|------|
| mmu-miR-471-3p   | 134-140 | 7mer-1A       | -0.01 | 29  | -0.01 | 0.113 | N/A  |
| mmu-miR-1934-3p  | 138-144 | 7mer-1A       | -0.11 | 75  | -0.11 | 0     | N/A  |
| mmu-miR-7b-5p    | 149-155 | 7mer-1A       | -0.03 | 60  | -0.03 | 0.269 | <0.1 |
| mmu-miR-7a-5p    | 149-155 | 7mer-1A       | -0.03 | 59  | -0.03 | 0.269 | <0.1 |
| mmu-miR-6917-5p  | 150-157 | 8mer          | -0.31 | 95  | -0.31 | 0     | N/A  |
| mmu-miR-5121     | 154-160 | 7mer-m8       | -0.2  | 80  | -0.2  | 0     | N/A  |
| mmu-miR-7002-5p  | 157-163 | 7mer-1A       | -0.06 | 65  | -0.06 | 0     | N/A  |
| mmu-miR-326-5p   | 164-170 | 7mer-1A       | -0.21 | 82  | -0.21 | 0     | N/A  |
| mmu-miR-486b-3p  | 164-170 | 7mer-1A       | -0.21 | 71  | -0.21 | 0     | N/A  |
| mmu-miR-486a-3p  | 164-170 | 7mer-1A       | -0.21 | 71  | -0.21 | 0     | N/A  |
| mmu-miR-6954-5p  | 164-170 | 7mer-1A       | -0.19 | 67  | -0.19 | 0     | N/A  |
| mmu-miR-31-3p    | 183-189 | 7mer-m8       | -0.16 | 81  | -0.16 | 0     | N/A  |
| mmu-miR-6996-5p  | 192-203 | non-canonical | N/A   | N/A | N/A   | 0     | N/A  |
| mmu-miR-6996-5p  | 192-203 | non-canonical | N/A   | N/A | N/A   | 0     | N/A  |
| mmu-miR-485-3p   | 200-206 | 7mer-m8       | -0.02 | 24  | -0.02 | 0     | N/A  |
| mmu-miR-6909-5p  | 209-215 | 7mer-m8       | -0.31 | 87  | -0.31 | 0     | N/A  |
| mmu-miR-6418-5p  | 211-217 | 7mer-1A       | -0.13 | 70  | -0.13 | 0     | N/A  |
| mmu-miR-7670-3p  | 217-223 | 7mer-1A       | -0.01 | 25  | -0.01 | 0.375 | <0.1 |
| mmu-miR-204-5p   | 217-223 | 7mer-1A       | -0.01 | 24  | -0.01 | 0.375 | <0.1 |
| mmu-miR-211-5p   | 217-223 | 7mer-1A       | -0.01 | 24  | -0.01 | 0.375 | <0.1 |
| mmu-miR-7002-5p  | 234-240 | 7mer-m8       | -0.05 | 62  | -0.05 | 0     | N/A  |
| mmu-miR-7091-3p  | 235-241 | 7mer-m8       | -0.02 | 21  | -0.02 | 0     | N/A  |
| mmu-miR-6973a-5p | 238-244 | 7mer-m8       | -0.18 | 71  | -0.18 | 0     | N/A  |
| mmu-miR-3085-5p  | 244-250 | 7mer-m8       | -0.1  | 46  | -0.1  | 0     | N/A  |
| mmu-miR-423-3p   | 248-255 | 8mer          | -0.5  | 94  | -0.5  | 0.299 | N/A  |
| mmu-miR-7686-3p  | 249-255 | 7mer-m8       | -0.26 | 72  | -0.26 | 0     | N/A  |
| mmu-miR-2861     | 254-260 | 7mer-m8       | -0.16 | 81  | -0.16 | 0     | N/A  |
| mmu-miR-3091-3p  | 254-260 | 7mer-m8       | -0.19 | 74  | -0.19 | 0     | N/A  |
| mmu-miR-330-3p.2 | 255-266 | non-canonical | N/A   | N/A | N/A   | 0     | N/A  |

|                  |         |               |       |     |       |       |     |
|------------------|---------|---------------|-------|-----|-------|-------|-----|
| mmu-miR-330-3p.2 | 255-266 | non-canonical | N/A   | N/A | N/A   | 0     | N/A |
| mmu-miR-6996-5p  | 259-266 | 8mer          | -0.21 | 89  | -0.21 | 0     | N/A |
| mmu-miR-6355     | 264-270 | 7mer-m8       | -0.03 | 70  | -0.03 | 0     | N/A |
| mmu-miR-6920-5p  | 265-271 | 7mer-m8       | -0.02 | 36  | -0.02 | 0     | N/A |
| mmu-miR-693-5p   | 268-275 | 8mer          | -0.3  | 96  | -0.3  | 0     | N/A |
| mmu-miR-3472     | 271-277 | 7mer-m8       | -0.14 | 83  | -0.14 | 0     | N/A |
| mmu-miR-295-5p   | 275-282 | 8mer          | -0.05 | 84  | -0.05 | 0.113 | N/A |
| mmu-miR-292b-5p  | 276-282 | 7mer-1A       | -0.05 | 80  | -0.05 | 0.411 | N/A |
| mmu-miR-294-5p   | 276-282 | 7mer-1A       | -0.04 | 75  | -0.04 | 0.411 | N/A |
| mmu-miR-290a-5p  | 276-282 | 7mer-1A       | -0.01 | 49  | -0.01 | 1.207 | N/A |
| mmu-miR-292a-5p  | 276-282 | 7mer-1A       | -0.01 | 48  | -0.01 | 1.207 | N/A |
| mmu-miR-293-5p   | 276-282 | 7mer-1A       | -0.01 | 47  | -0.01 | 1.207 | N/A |
| mmu-miR-5133     | 284-290 | 7mer-m8       | -0.18 | 93  | -0.18 | 0     | N/A |
| mmu-miR-6950-5p  | 285-291 | 7mer-m8       | -0.12 | 72  | -0.12 | 0     | N/A |
| mmu-miR-6379     | 286-293 | 8mer          | -0.26 | 94  | -0.26 | 0     | N/A |
| mmu-miR-7671-5p  | 291-297 | 7mer-1A       | -0.17 | 80  | -0.17 | 0     | N/A |
| mmu-miR-149-5p   | 292-298 | 7mer-m8       | -0.15 | 83  | -0.15 | 0.264 | N/A |
| mmu-miR-7087-3p  | 293-300 | 8mer          | -0.32 | 93  | -0.32 | 0     | N/A |
| mmu-miR-3963     | 307-313 | 7mer-1A       | -0.11 | 64  | -0.11 | 0     | N/A |
| mmu-miR-223-5p   | 309-315 | 7mer-1A       | -0.05 | 53  | -0.05 | 0.113 | N/A |
| mmu-miR-7089-3p  | 316-323 | 8mer          | -0.37 | 98  | -0.37 | 0     | N/A |
| mmu-miR-33-3p    | 325-331 | 7mer-m8       | -0.02 | 51  | -0.02 | 0.113 | N/A |
| mmu-miR-7119-3p  | 331-337 | 7mer-m8       | -0.02 | 39  | -0.02 | 0     | N/A |
| mmu-miR-1668     | 343-349 | 7mer-m8       | -0.18 | 90  | -0.18 | 0     | N/A |
| mmu-miR-7062-5p  | 351-357 | 7mer-1A       | -0.09 | 66  | -0.09 | 0     | N/A |
| mmu-miR-3475-3p  | 352-358 | 7mer-m8       | -0.13 | 80  | -0.13 | 0     | N/A |
| mmu-miR-6972-5p  | 352-358 | 7mer-m8       | -0.09 | 80  | -0.09 | 0     | N/A |
| mmu-miR-6950-5p  | 353-360 | 8mer          | -0.25 | 92  | -0.25 | 0     | N/A |
| mmu-miR-483-3p.1 | 357-363 | 7mer-1A       | -0.01 | 31  | -0.01 | 0.694 | N/A |

|                 |         |         |       |    |       |       |      |
|-----------------|---------|---------|-------|----|-------|-------|------|
| mmu-miR-7055-3p | 360-367 | 8mer    | -0.33 | 96 | -0.33 | 0     | N/A  |
| mmu-miR-33-5p   | 367-373 | 7mer-1A | -0.07 | 81 | -0.07 | 2.639 | <0.1 |
| mmu-miR-450b-5p | 369-375 | 7mer-1A | -0.11 | 85 | -0.11 | 0     | N/A  |
| mmu-miR-129-5p  | 370-376 | 7mer-m8 | -0.02 | 77 | -0.02 | 1.069 | <0.1 |
| mmu-miR-129b-5p | 371-377 | 7mer-m8 | -0.02 | 75 | -0.02 | 0     | N/A  |
| mmu-miR-7091-3p | 375-381 | 7mer-m8 | -0.16 | 80 | -0.16 | 0     | N/A  |
| mmu-miR-7037-5p | 377-383 | 7mer-m8 | -0.26 | 90 | -0.26 | 0     | N/A  |
| mmu-miR-298-5p  | 381-387 | 7mer-m8 | -0.14 | 87 | -0.14 | 0     | N/A  |
| mmu-miR-6969-5p | 382-388 | 7mer-m8 | -0.08 | 72 | -0.08 | 0     | N/A  |
| mmu-miR-5621-3p | 393-399 | 7mer-m8 | -0.17 | 74 | -0.17 | 0     | N/A  |
| mmu-miR-1946a   | 396-403 | 8mer    | -0.52 | 97 | -0.52 | 0     | N/A  |
| mmu-miR-7658-3p | 403-409 | 7mer-1A | -0.07 | 72 | -0.07 | 0     | N/A  |
| mmu-miR-1968-3p | 403-409 | 7mer-1A | -0.01 | 31 | -0.01 | 0     | N/A  |
| mmu-miR-1952    | 404-411 | 8mer    | -0.31 | 96 | -0.31 | 0     | N/A  |
| mmu-miR-6974-3p | 405-411 | 7mer-1A | -0.04 | 51 | -0.04 | 0     | N/A  |
| mmu-miR-7649-3p | 406-412 | 7mer-m8 | -0.11 | 71 | -0.11 | 0     | N/A  |
| mmu-miR-3473c   | 406-412 | 7mer-m8 | -0.07 | 60 | -0.07 | 0     | N/A  |
| mmu-miR-6908-3p | 408-414 | 7mer-m8 | -0.15 | 86 | -0.15 | 0     | N/A  |
| mmu-miR-7013-3p | 411-417 | 7mer-1A | -0.1  | 83 | -0.1  | 0     | N/A  |
| mmu-miR-6911-3p | 414-420 | 7mer-m8 | -0.19 | 91 | -0.19 | 0     | N/A  |
| mmu-miR-7227-3p | 425-431 | 7mer-1A | -0.11 | 92 | -0.11 | 0     | N/A  |
| mmu-miR-6984-5p | 425-431 | 7mer-1A | -0.11 | 88 | -0.11 | 0.445 | N/A  |
| mmu-miR-875-3p  | 425-431 | 7mer-1A | -0.1  | 88 | -0.1  | 0     | N/A  |
| mmu-miR-7079-3p | 429-436 | 8mer    | -0.3  | 94 | -0.3  | 0     | N/A  |
| mmu-miR-7235-3p | 431-437 | 7mer-m8 | -0.16 | 88 | -0.16 | 0.113 | N/A  |
| mmu-miR-1936    | 433-439 | 7mer-m8 | -0.28 | 97 | -0.28 | 0     | N/A  |
| mmu-miR-495-3p  | 437-443 | 7mer-m8 | -0.13 | 95 | -0.13 | 0     | N/A  |
| mmu-miR-1192    | 437-443 | 7mer-m8 | -0.13 | 94 | -0.13 | 0     | N/A  |
| mmu-miR-8118    | 440-447 | 8mer    | -0.14 | 95 | -0.14 | 0     | N/A  |

|                  |         |         |       |    |       |       |     |
|------------------|---------|---------|-------|----|-------|-------|-----|
| mmu-let-7c-1-3p  | 443-449 | 7mer-m8 | -0.15 | 89 | -0.15 | 0     | N/A |
| mmu-miR-338-5p   | 453-459 | 7mer-1A | -0.01 | 38 | -0.01 | 0.113 | N/A |
| mmu-miR-1197-3p  | 469-475 | 7mer-1A | -0.17 | 87 | -0.17 | 0     | N/A |
| mmu-miR-7011-5p  | 476-483 | 8mer    | -0.52 | 99 | -0.52 | 0     | N/A |
| mmu-miR-6982-5p  | 477-484 | 8mer    | -0.51 | 99 | -0.51 | 0     | N/A |
| mmu-miR-8100     | 477-483 | 7mer-1A | -0.27 | 94 | -0.27 | 0     | N/A |
| mmu-miR-1843b-5p | 478-484 | 7mer-1A | -0.19 | 90 | -0.19 | 0     | N/A |
| mmu-miR-3473f    | 490-496 | 7mer-1A | -0.13 | 92 | -0.13 | 0     | N/A |
| mmu-let-7c-2-3p  | 504-510 | 7mer-m8 | -0.2  | 97 | -0.2  | 0.505 | N/A |
| mmu-let-7a-1-3p  | 504-510 | 7mer-m8 | -0.2  | 97 | -0.2  | 0.505 | N/A |
| mmu-let-7b-3p    | 504-510 | 7mer-m8 | -0.18 | 96 | -0.18 | 0.505 | N/A |
| mmu-miR-98-3p    | 504-510 | 7mer-m8 | -0.16 | 94 | -0.16 | 0.505 | N/A |
| mmu-let-7f-1-3p  | 504-510 | 7mer-m8 | -0.16 | 94 | -0.16 | 0.505 | N/A |
| mmu-miR-669b-3p  | 505-511 | 7mer-m8 | -0.12 | 85 | -0.12 | 0     | N/A |
| mmu-miR-467a-3p  | 505-511 | 7mer-m8 | -0.1  | 82 | -0.1  | 0     | N/A |
| mmu-miR-669f-3p  | 505-511 | 7mer-m8 | -0.1  | 82 | -0.1  | 0     | N/A |
| mmu-miR-338-5p   | 508-515 | 8mer    | -0.28 | 98 | -0.26 | 0.505 | N/A |
| mmu-miR-3094-3p  | 516-522 | 7mer-m8 | -0.08 | 84 | -0.07 | 0     | N/A |
| mmu-miR-374b-5p  | 525-531 | 7mer-1A | -0.1  | 90 | -0.09 | 0.299 | N/A |
| mmu-miR-6374     | 527-533 | 7mer-m8 | -0.16 | 91 | -0.15 | 0     | N/A |
| mmu-miR-717      | 534-541 | 8mer    | -0.44 | 98 | -0.4  | 0     | N/A |
| mmu-miR-3097-3p  | 535-541 | 7mer-1A | -0.16 | 82 | -0.15 | 0     | N/A |
| mmu-miR-871-5p   | 536-542 | 7mer-m8 | -0.12 | 84 | -0.11 | 0     | N/A |
| mmu-miR-743a-5p  | 536-542 | 7mer-m8 | -0.11 | 83 | -0.1  | 0     | N/A |
| mmu-miR-5625-3p  | 538-545 | 8mer    | -0.27 | 95 | -0.24 | 0     | N/A |
| mmu-miR-20a-3p   | 547-554 | 8mer    | -0.31 | 96 | -0.28 | 0.113 | N/A |
| mmu-miR-1950     | 548-554 | 7mer-1A | -0.1  | 79 | -0.09 | 0     | N/A |
| mmu-miR-6962-3p  | 550-556 | 7mer-1A | -0.09 | 72 | -0.09 | 0     | N/A |
| mmu-miR-331-5p   | 554-561 | 8mer    | -0.32 | 96 | -0.3  | 0     | N/A |

|                  |         |         |       |    |       |       |      |
|------------------|---------|---------|-------|----|-------|-------|------|
| mmu-miR-6973b-5p | 554-561 | 8mer    | -0.23 | 95 | -0.21 | 0     | N/A  |
| mmu-miR-7211-3p  | 583-589 | 7mer-m8 | -0.31 | 96 | -0.29 | 0     | N/A  |
| mmu-miR-8091     | 583-589 | 7mer-m8 | -0.31 | 96 | -0.29 | 0     | N/A  |
| mmu-miR-7021-5p  | 585-591 | 7mer-m8 | -0.2  | 88 | -0.19 | 0     | N/A  |
| mmu-miR-380-3p   | 589-595 | 7mer-1A | -0.06 | 62 | -0.06 | 0     | N/A  |
| mmu-miR-202-5p   | 592-599 | 8mer    | -0.31 | 96 | -0.29 | 0.113 | <0.1 |
| mmu-miR-6896-3p  | 638-645 | 8mer    | -0.24 | 96 | -0.22 | 0     | N/A  |
| mmu-miR-7119-3p  | 657-663 | 7mer-m8 | -0.02 | 39 | -0.02 | 0     | N/A  |
| mmu-miR-133a-5p  | 671-677 | 7mer-m8 | -0.17 | 89 | -0.16 | 0     | N/A  |
| mmu-miR-138-5p   | 673-679 | 7mer-1A | -0.2  | 72 | -0.18 | 0     | <0.1 |
| mmu-miR-370-3p   | 675-682 | 8mer    | -0.29 | 97 | -0.27 | 0.113 | N/A  |
| mmu-miR-3074-5p  | 677-683 | 7mer-m8 | -0.09 | 89 | -0.09 | 0     | N/A  |
| mmu-miR-7674-3p  | 681-687 | 7mer-m8 | -0.1  | 78 | -0.1  | 0     | N/A  |
| mmu-miR-292b-3p  | 685-691 | 7mer-m8 | -0.25 | 92 | -0.23 | 0     | N/A  |
| mmu-miR-7023-3p  | 694-700 | 7mer-1A | -0.17 | 85 | -0.16 | 0     | N/A  |
| mmu-miR-7018-3p  | 694-700 | 7mer-1A | -0.14 | 79 | -0.13 | 0     | N/A  |
| mmu-miR-7047-3p  | 694-700 | 7mer-1A | -0.13 | 78 | -0.12 | 0     | N/A  |
| mmu-miR-7068-3p  | 694-700 | 7mer-1A | -0.14 | 78 | -0.13 | 0     | N/A  |
| mmu-miR-1193-3p  | 697-703 | 7mer-m8 | -0.18 | 85 | -0.17 | 0     | N/A  |
| mmu-miR-370-5p   | 697-703 | 7mer-m8 | -0.17 | 83 | -0.16 | 0     | N/A  |
| mmu-miR-7119-3p  | 716-722 | 7mer-m8 | -0.02 | 39 | -0.02 | 0     | N/A  |
| mmu-miR-1192     | 720-726 | 7mer-1A | -0.06 | 87 | -0.05 | 0     | N/A  |
| mmu-miR-7a-1-3p  | 720-726 | 7mer-1A | -0.03 | 86 | -0.02 | 0     | N/A  |
| mmu-miR-495-3p   | 720-726 | 7mer-1A | -0.01 | 60 | -0.01 | 0     | N/A  |
| mmu-miR-540-3p   | 737-744 | 8mer    | -0.44 | 98 | -0.41 | 0     | N/A  |
| mmu-miR-6915-5p  | 737-744 | 8mer    | -0.44 | 98 | -0.41 | 0     | N/A  |
| mmu-miR-133b-5p  | 739-745 | 7mer-m8 | -0.19 | 89 | -0.18 | 0     | N/A  |
| mmu-miR-7036b-3p | 741-747 | 7mer-m8 | -0.18 | 91 | -0.16 | 0     | N/A  |
| mmu-let-7b-3p    | 750-756 | 7mer-m8 | -0.11 | 88 | -0.1  | 0.874 | N/A  |

|                 |         |         |       |    |       |       |     |
|-----------------|---------|---------|-------|----|-------|-------|-----|
| mmu-let-7c-2-3p | 750-756 | 7mer-m8 | -0.11 | 88 | -0.1  | 0.874 | N/A |
| mmu-let-7a-1-3p | 750-756 | 7mer-m8 | -0.11 | 88 | -0.1  | 0.874 | N/A |
| mmu-miR-98-3p   | 750-756 | 7mer-m8 | -0.09 | 83 | -0.08 | 0.874 | N/A |
| mmu-let-7f-1-3p | 750-756 | 7mer-m8 | -0.09 | 83 | -0.08 | 0.874 | N/A |
| mmu-miR-539-3p  | 750-756 | 7mer-1A | -0.05 | 77 | -0.05 | 1.412 | N/A |
| mmu-miR-381-3p  | 750-756 | 7mer-1A | -0.03 | 70 | -0.03 | 1.412 | N/A |
| mmu-miR-467a-3p | 751-757 | 7mer-m8 | -0.04 | 66 | -0.04 | 0     | N/A |
| mmu-miR-669f-3p | 751-757 | 7mer-m8 | -0.04 | 66 | -0.04 | 0     | N/A |
| mmu-miR-669b-3p | 751-757 | 7mer-m8 | -0.04 | 65 | -0.04 | 0     | N/A |
| mmu-miR-16-2-3p | 754-760 | 7mer-m8 | -0.19 | 92 | -0.17 | 0     | N/A |
| mmu-miR-340-5p  | 767-773 | 7mer-1A | -0.01 | 50 | -0.01 | 2.821 | N/A |
| mmu-miR-6414    | 776-782 | 7mer-1A | -0.03 | 64 | -0.03 | 0     | N/A |
| mmu-miR-6970-5p | 776-782 | 7mer-1A | -0.01 | 44 | -0.01 | 0     | N/A |
| mmu-miR-7210-5p | 781-787 | 7mer-1A | -0.05 | 83 | -0.04 | 0     | N/A |
| mmu-miR-543-3p  | 781-787 | 7mer-1A | -0.01 | 65 | -0.01 | 2.897 | N/A |
| mmu-miR-669p-3p | 782-788 | 7mer-m8 | -0.11 | 90 | -0.1  | 0     | N/A |
| mmu-miR-6905-3p | 784-790 | 7mer-1A | -0.07 | 83 | -0.07 | 0     | N/A |
| mmu-miR-295-5p  | 790-796 | 7mer-m8 | -0.03 | 74 | -0.03 | 0     | N/A |
| mmu-miR-711     | 796-802 | 7mer-1A | -0.23 | 94 | -0.21 | 0     | N/A |
| mmu-miR-15a-3p  | 804-810 | 7mer-m8 | -0.16 | 88 | -0.14 | 0     | N/A |
| mmu-miR-7240-5p | 809-815 | 7mer-m8 | -0.13 | 81 | -0.12 | 0     | N/A |
| mmu-miR-882     | 809-815 | 7mer-1A | -0.08 | 60 | -0.07 | 0.315 | N/A |
| mmu-miR-7216-5p | 809-815 | 7mer-1A | -0.05 | 60 | -0.04 | 0     | N/A |
| mmu-miR-185-5p  | 809-815 | 7mer-1A | -0.07 | 52 | -0.06 | 0.315 | N/A |
| mmu-miR-3473a   | 809-815 | 7mer-1A | -0.05 | 46 | -0.05 | 0.315 | N/A |
| mmu-miR-7012-5p | 816-822 | 7mer-m8 | -0.12 | 78 | -0.11 | 0     | N/A |
| mmu-miR-8113    | 816-822 | 7mer-m8 | -0.12 | 78 | -0.11 | 0     | N/A |
| mmu-miR-8119    | 816-822 | 7mer-m8 | -0.06 | 75 | -0.05 | 0     | N/A |
| mmu-miR-7057-5p | 816-822 | 7mer-m8 | -0.09 | 73 | -0.09 | 0     | N/A |

|                   |         |         |       |    |       |       |      |
|-------------------|---------|---------|-------|----|-------|-------|------|
| mmu-miR-7050-5p   | 817-823 | 7mer-m8 | -0.04 | 56 | -0.04 | 0     | N/A  |
| mmu-miR-665-3p    | 818-825 | 8mer    | -0.41 | 98 | -0.38 | 0.24  | N/A  |
| mmu-miR-7222-3p   | 819-825 | 7mer-1A | -0.14 | 85 | -0.12 | 0     | N/A  |
| mmu-miR-1956      | 820-826 | 7mer-m8 | -0.33 | 93 | -0.3  | 0.113 | N/A  |
| mmu-miR-7647-3p   | 821-827 | 7mer-m8 | -0.21 | 89 | -0.19 | 0     | N/A  |
| mmu-miR-455-3p.1  | 822-828 | 7mer-m8 | -0.12 | 78 | -0.11 | 0.299 | <0.1 |
| mmu-miR-101b-3p.1 | 825-831 | 7mer-1A | -0.05 | 69 | -0.04 | 0.299 | <0.1 |
| mmu-miR-101b-3p.2 | 825-831 | 7mer-1A | -0.05 | 69 | -0.04 | 0.299 | <0.1 |
| mmu-miR-101a-3p.2 | 825-831 | 7mer-1A | -0.05 | 69 | -0.04 | 0.299 | <0.1 |
| mmu-miR-582-5p    | 825-831 | 7mer-1A | -0.05 | 61 | -0.04 | 0.299 | N/A  |
| mmu-miR-208a-5p   | 830-836 | 7mer-m8 | -0.02 | 60 | 0     | 0.445 | N/A  |
| mmu-miR-6415      | 830-836 | 7mer-m8 | -0.02 | 60 | 0     | 0.445 | N/A  |
| mmu-miR-208b-5p   | 830-836 | 7mer-m8 | -0.02 | 48 | 0     | 0.445 | N/A  |
| mmu-miR-693-3p    | 831-837 | 7mer-m8 | -0.04 | 76 | -0.01 | 0     | N/A  |
| mmu-miR-674-3p    | 833-839 | 7mer-1A | -0.08 | 75 | -0.02 | 0     | N/A  |
| mmu-miR-351-3p    | 852-859 | 8mer    | -0.2  | 92 | -0.04 | 0     | N/A  |
| mmu-miR-599       | 855-861 | 7mer-m8 | -0.17 | 83 | -0.03 | 0     | N/A  |
| mmu-miR-1970      | 855-861 | 7mer-1A | -0.12 | 74 | -0.02 | 0     | N/A  |
| mmu-miR-5129-3p   | 863-869 | 7mer-m8 | -0.19 | 86 | -0.04 | 0.672 | <0.1 |
| mmu-miR-455-5p    | 863-869 | 7mer-m8 | -0.18 | 85 | -0.03 | 0.672 | <0.1 |
| mmu-miR-7651-5p   | 873-879 | 7mer-m8 | -0.15 | 81 | -0.03 | 0.815 | N/A  |
| mmu-miR-6976-5p   | 878-884 | 7mer-m8 | -0.11 | 77 | -0.02 | 0     | N/A  |
| mmu-miR-7665-5p   | 878-884 | 7mer-m8 | -0.11 | 77 | -0.02 | 0     | N/A  |
| mmu-miR-7218-5p   | 881-887 | 7mer-1A | -0.18 | 86 | -0.03 | 0     | N/A  |
| mmu-miR-7067-5p   | 881-887 | 7mer-1A | -0.15 | 77 | -0.03 | 0     | N/A  |
| mmu-miR-7092-5p   | 888-894 | 7mer-1A | -0.16 | 89 | -0.03 | 0     | N/A  |
| mmu-miR-6540-5p   | 888-895 | 8mer    | -0.23 | 77 | -0.04 | 0.982 | <0.1 |
| mmu-miR-124-3p.2  | 888-895 | 8mer    | -0.21 | 74 | -0.04 | 0.982 | <0.1 |
| mmu-miR-124-3p.1  | 888-894 | 7mer-1A | -0.07 | 73 | -0.01 | 0.982 | <0.1 |



|                   |         |         |       |    |       |       |      |
|-------------------|---------|---------|-------|----|-------|-------|------|
| mmu-miR-5624-3p   | 888-895 | 8mer    | -0.18 | 70 | -0.03 | 0.982 | <0.1 |
| mmu-miR-7002-5p   | 894-900 | 7mer-1A | -0.02 | 42 | 0     | 0     | N/A  |
| mmu-miR-6375      | 896-902 | 7mer-m8 | -0.17 | 91 | -0.03 | 0     | N/A  |
| mmu-miR-4661-3p   | 900-906 | 7mer-1A | -0.01 | 34 | 0     | 0     | N/A  |
| mmu-miR-568       | 902-908 | 7mer-m8 | -0.04 | 50 | -0.01 | 0.507 | N/A  |
| mmu-miR-344h-3p   | 902-908 | 7mer-1A | -0.01 | 44 | 0     | 0.113 | N/A  |
| mmu-miR-223-5p    | 904-910 | 7mer-1A | -0.09 | 69 | -0.02 | 0.468 | N/A  |
| mmu-miR-669n      | 906-912 | 7mer-m8 | -0.1  | 84 | -0.02 | 0.409 | N/A  |
| mmu-miR-592-5p    | 906-912 | 7mer-1A | -0.07 | 72 | -0.01 | 0.652 | N/A  |
| mmu-miR-6377      | 908-914 | 7mer-m8 | -0.06 | 81 | -0.01 | 0     | N/A  |
| mmu-miR-935       | 932-938 | 7mer-m8 | -0.02 | 23 | 0     | 0     | N/A  |
| mmu-miR-216c-3p   | 945-951 | 7mer-m8 | -0.05 | 51 | -0.01 | 0     | N/A  |
| mmu-miR-6908-5p   | 945-951 | 7mer-1A | -0.01 | 28 | 0     | 0     | N/A  |
| mmu-miR-543-5p    | 947-953 | 7mer-m8 | -0.15 | 76 | -0.03 | 0     | N/A  |
| mmu-miR-219a-1-3p | 948-954 | 7mer-m8 | -0.15 | 81 | -0.03 | 0     | N/A  |
| mmu-miR-7072-5p   | 952-958 | 7mer-m8 | -0.06 | 65 | -0.01 | 0.499 | N/A  |
| mmu-miR-7030-5p   | 956-962 | 7mer-m8 | -0.14 | 61 | -0.03 | 0     | N/A  |
| mmu-miR-7075-5p   | 956-962 | 7mer-m8 | -0.11 | 52 | -0.02 | 0     | N/A  |
| mmu-miR-7076-5p   | 956-962 | 7mer-m8 | -0.12 | 52 | -0.02 | 0     | N/A  |
| mmu-miR-6971-5p   | 957-964 | 8mer    | -0.23 | 72 | -0.04 | 0     | N/A  |
| mmu-miR-7024-5p   | 958-964 | 7mer-m8 | -0.14 | 66 | -0.03 | 0     | N/A  |
| mmu-miR-7119-5p   | 958-964 | 7mer-m8 | -0.11 | 60 | -0.02 | 0     | N/A  |
| mmu-miR-7023-5p   | 958-964 | 7mer-m8 | -0.11 | 57 | -0.02 | 0     | N/A  |
| mmu-miR-7073-5p   | 958-964 | 7mer-1A | -0.11 | 48 | -0.02 | 0     | N/A  |
| mmu-miR-6941-5p   | 958-964 | 7mer-m8 | -0.07 | 45 | -0.01 | 0     | N/A  |
| mmu-miR-7212-5p   | 959-965 | 7mer-m8 | -0.16 | 80 | -0.03 | 0     | N/A  |
| mmu-miR-7117-5p   | 959-965 | 7mer-m8 | -0.16 | 79 | -0.03 | 0     | N/A  |
| mmu-miR-3083-5p   | 961-968 | 8mer    | -0.16 | 73 | -0.03 | 0.409 | N/A  |
| mmu-miR-7679-5p   | 962-968 | 7mer-1A | -0.13 | 73 | -0.02 | 0     | N/A  |

|                 |           |         |       |    |       |       |      |
|-----------------|-----------|---------|-------|----|-------|-------|------|
| mmu-miR-664-5p  | 962-968   | 7mer-m8 | -0.09 | 67 | -0.02 | 0.409 | N/A  |
| mmu-miR-3473e   | 962-968   | 7mer-1A | -0.04 | 49 | -0.01 | 0.409 | N/A  |
| mmu-miR-3473b   | 962-968   | 7mer-1A | -0.04 | 49 | -0.01 | 0.409 | N/A  |
| mmu-miR-3085-3p | 963-969   | 7mer-m8 | -0.14 | 78 | -0.03 | 0.763 | 0.18 |
| mmu-miR-3064-5p | 963-969   | 7mer-m8 | -0.14 | 78 | -0.03 | 0.763 | 0.18 |
| mmu-miR-871-3p  | 965-971   | 7mer-m8 | -0.2  | 83 | -0.04 | 0.113 | N/A  |
| mmu-miR-6976-5p | 972-978   | 7mer-m8 | -0.07 | 69 | -0.01 | 0     | N/A  |
| mmu-miR-7665-5p | 972-978   | 7mer-m8 | -0.07 | 66 | -0.01 | 0     | N/A  |
| mmu-miR-7054-5p | 976-982   | 7mer-m8 | -0.13 | 84 | -0.03 | 0.409 | N/A  |
| mmu-miR-6999-5p | 976-982   | 7mer-m8 | -0.08 | 73 | -0.02 | 0.409 | N/A  |
| mmu-miR-6244    | 984-990   | 7mer-1A | -0.24 | 85 | -0.04 | 0     | N/A  |
| mmu-miR-5120    | 985-991   | 7mer-m8 | -0.21 | 88 | -0.04 | 0     | N/A  |
| mmu-miR-5710    | 987-993   | 7mer-1A | -0.09 | 65 | -0.02 | 0     | N/A  |
| mmu-miR-7229-3p | 997-1003  | 7mer-m8 | -0.08 | 76 | -0.01 | 0     | N/A  |
| mmu-miR-672-3p  | 998-1005  | 8mer    | -0.23 | 97 | -0.04 | 0.113 | N/A  |
| mmu-miR-377-3p  | 999-1005  | 7mer-m8 | -0.07 | 51 | -0.01 | 1.069 | N/A  |
| mmu-miR-374b-3p | 1007-1013 | 7mer-1A | -0.01 | 18 | 0     | 0     | N/A  |
| mmu-miR-544-5p  | 1010-1016 | 7mer-1A | -0.05 | 56 | -0.01 | 0     | N/A  |
| mmu-miR-6964-3p | 1011-1017 | 7mer-m8 | -0.04 | 69 | -0.01 | 0     | N/A  |
| mmu-miR-1903    | 1013-1019 | 7mer-1A | -0.01 | 31 | 0     | 0     | N/A  |
| mmu-miR-1191a   | 1016-1022 | 7mer-1A | -0.18 | 91 | -0.03 | 0     | N/A  |
| mmu-miR-6516-5p | 1062-1069 | 8mer    | -0.22 | 93 | -0.04 | 0.609 | N/A  |
| mmu-miR-450b-5p | 1063-1070 | 8mer    | -0.15 | 90 | -0.03 | 0     | N/A  |
| mmu-miR-7078-3p | 1067-1073 | 7mer-1A | -0.01 | 39 | 0     | 0     | N/A  |
| mmu-miR-804     | 1073-1079 | 7mer-m8 | -0.2  | 89 | -0.04 | 0     | N/A  |
| mmu-miR-7680-5p | 1078-1085 | 8mer    | -0.22 | 94 | -0.04 | 0     | N/A  |
| mmu-miR-6344    | 1081-1087 | 7mer-1A | -0.03 | 82 | -0.01 | 0     | N/A  |
| mmu-miR-7116-3p | 1082-1089 | 8mer    | -0.03 | 89 | -0.01 | 0     | N/A  |
| mmu-miR-6951-3p | 1082-1089 | 8mer    | -0.03 | 88 | -0.01 | 0     | N/A  |

|                 |           |         |       |    |       |       |      |
|-----------------|-----------|---------|-------|----|-------|-------|------|
| mmu-miR-195a-3p | 1088-1094 | 7mer-m8 | -0.07 | 82 | -0.01 | 0     | N/A  |
| mmu-miR-338-5p  | 1089-1096 | 8mer    | -0.18 | 96 | -0.03 | 0     | N/A  |
| mmu-miR-3095-5p | 1105-1111 | 7mer-m8 | -0.16 | 91 | -0.03 | 0     | N/A  |
| mmu-miR-9-3p    | 1108-1114 | 7mer-m8 | -0.12 | 84 | -0.02 | 1.296 | N/A  |
| mmu-miR-204-5p  | 1133-1139 | 7mer-m8 | -0.07 | 70 | -0.01 | 0.804 | <0.1 |
| mmu-miR-7670-3p | 1133-1139 | 7mer-m8 | -0.06 | 67 | -0.01 | 0.804 | <0.1 |
| mmu-miR-211-5p  | 1133-1139 | 7mer-m8 | -0.06 | 66 | -0.01 | 0.804 | <0.1 |
| mmu-miR-343     | 1134-1141 | 8mer    | -0.24 | 95 | -0.04 | 0     | N/A  |
| mmu-miR-6976-3p | 1135-1141 | 7mer-m8 | -0.17 | 83 | -0.03 | 0     | N/A  |
| mmu-miR-702-3p  | 1149-1156 | 8mer    | -0.21 | 82 | -0.04 | 0     | N/A  |
| mmu-miR-6393    | 1150-1156 | 7mer-m8 | -0.1  | 77 | -0.02 | 0     | N/A  |
| mmu-miR-6990-3p | 1154-1160 | 7mer-m8 | -0.14 | 77 | -0.03 | 0     | N/A  |
| mmu-miR-7035-3p | 1158-1164 | 7mer-m8 | -0.07 | 67 | -0.01 | 0     | N/A  |
| mmu-miR-6367    | 1160-1166 | 7mer-m8 | -0.08 | 60 | -0.02 | 0     | <0.1 |
| mmu-miR-351-5p  | 1160-1166 | 7mer-m8 | -0.07 | 56 | -0.01 | 0     | <0.1 |
| mmu-miR-6394    | 1160-1166 | 7mer-m8 | -0.07 | 56 | -0.01 | 0     | <0.1 |
| mmu-miR-125a-5p | 1160-1166 | 7mer-m8 | -0.06 | 53 | -0.01 | 0     | <0.1 |
| mmu-miR-125b-5p | 1160-1166 | 7mer-m8 | -0.06 | 53 | -0.01 | 0     | <0.1 |
| mmu-miR-874-3p  | 1162-1169 | 8mer    | -0.23 | 91 | -0.04 | 0     | N/A  |
| mmu-miR-1231-3p | 1162-1168 | 7mer-1A | -0.17 | 87 | -0.03 | 0     | N/A  |
| mmu-miR-6990-3p | 1162-1168 | 7mer-1A | -0.07 | 64 | -0.01 | 0     | N/A  |
| mmu-miR-6354    | 1162-1168 | 7mer-1A | -0.08 | 57 | -0.02 | 0     | N/A  |
| mmu-miR-7660-5p | 1163-1169 | 7mer-m8 | -0.06 | 44 | -0.01 | 0     | N/A  |
| mmu-miR-7067-3p | 1166-1172 | 7mer-1A | -0.03 | 21 | -0.01 | 0     | N/A  |
| mmu-miR-7b-5p   | 1180-1186 | 7mer-1A | -0.01 | 35 | 0     | 0.205 | <0.1 |
| mmu-miR-7a-5p   | 1180-1186 | 7mer-1A | -0.01 | 35 | 0     | 0.205 | <0.1 |
| mmu-miR-8099    | 1190-1196 | 7mer-1A | -0.16 | 87 | -0.03 | 0     | N/A  |
| mmu-miR-1898    | 1192-1198 | 7mer-m8 | -0.16 | 72 | -0.03 | 0     | N/A  |
| mmu-miR-3964    | 1196-1202 | 7mer-1A | -0.11 | 68 | -0.02 | 0     | N/A  |

|                 |           |         |       |    |       |       |      |
|-----------------|-----------|---------|-------|----|-------|-------|------|
| mmu-miR-7013-3p | 1206-1212 | 7mer-m8 | -0.02 | 51 | 0     | 0     | N/A  |
| mmu-miR-770-5p  | 1210-1216 | 7mer-m8 | -0.23 | 90 | -0.04 | 0.113 | N/A  |
| mmu-miR-29a-3p  | 1211-1217 | 7mer-m8 | -0.11 | 66 | -0.02 | 0.113 | <0.1 |
| mmu-miR-29c-3p  | 1211-1217 | 7mer-m8 | -0.11 | 66 | -0.02 | 0.113 | <0.1 |
| mmu-miR-29b-3p  | 1211-1217 | 7mer-m8 | -0.1  | 63 | -0.02 | 0.113 | <0.1 |
| mmu-miR-6346    | 1231-1238 | 8mer    | -0.25 | 95 | -0.05 | 0     | N/A  |
| mmu-miR-6350    | 1231-1238 | 8mer    | -0.21 | 93 | -0.04 | 0     | N/A  |
| mmu-miR-3060-3p | 1234-1240 | 7mer-m8 | -0.12 | 66 | -0.02 | 0     | N/A  |
| mmu-miR-7042-5p | 1239-1245 | 7mer-m8 | -0.15 | 85 | -0.03 | 0     | N/A  |
| mmu-miR-654-5p  | 1244-1250 | 7mer-1A | -0.07 | 63 | -0.01 | 0     | N/A  |
| mmu-miR-7049-3p | 1254-1261 | 8mer    | -0.28 | 92 | -0.05 | 0     | N/A  |
| mmu-miR-7044-3p | 1255-1261 | 7mer-m8 | -0.1  | 72 | -0.02 | 0     | N/A  |
| mmu-miR-6954-3p | 1255-1261 | 7mer-1A | -0.09 | 56 | -0.02 | 0     | N/A  |
| mmu-miR-7666-3p | 1256-1262 | 7mer-m8 | -0.02 | 61 | 0     | 0     | N/A  |
| mmu-miR-7086-5p | 1264-1270 | 7mer-m8 | -0.08 | 70 | -0.01 | 0     | N/A  |
| mmu-miR-7661-5p | 1268-1274 | 7mer-m8 | -0.02 | 44 | 0     | 0     | N/A  |
| mmu-miR-3547-3p | 1282-1288 | 7mer-1A | -0.05 | 51 | -0.01 | 0.113 | N/A  |
| mmu-miR-6927-3p | 1284-1290 | 7mer-1A | -0.04 | 54 | -0.01 | 0     | N/A  |
| mmu-miR-7035-3p | 1284-1290 | 7mer-1A | -0.01 | 30 | 0     | 0     | N/A  |
| mmu-miR-6945-3p | 1284-1290 | 7mer-1A | -0.01 | 21 | 0     | 0     | N/A  |
| mmu-miR-301a-5p | 1286-1292 | 7mer-1A | -0.01 | 46 | 0     | 0.113 | N/A  |
| mmu-miR-301b-5p | 1286-1292 | 7mer-1A | -0.01 | 46 | 0     | 0.113 | N/A  |
| mmu-miR-6952-3p | 1286-1292 | 7mer-1A | -0.01 | 38 | 0     | 0.113 | N/A  |
| mmu-miR-1896    | 1286-1292 | 7mer-m8 | -0.02 | 33 | 0     | 0     | N/A  |
| mmu-miR-216b-5p | 1288-1294 | 7mer-m8 | -0.02 | 30 | 0     | 0.613 | <0.1 |
| mmu-miR-7086-5p | 1297-1303 | 7mer-m8 | -0.18 | 88 | -0.03 | 0     | N/A  |
| mmu-miR-3096-5p | 1311-1317 | 7mer-1A | -0.15 | 76 | -0.03 | 0     | N/A  |
| mmu-miR-3090-5p | 1323-1330 | 8mer    | -0.15 | 89 | -0.03 | 0     | N/A  |
| mmu-miR-7213-5p | 1323-1329 | 7mer-1A | -0.1  | 71 | -0.02 | 0     | N/A  |

|                  |           |               |       |     |       |       |      |
|------------------|-----------|---------------|-------|-----|-------|-------|------|
| mmu-miR-7019-5p  | 1324-1330 | 7mer-1A       | -0.12 | 69  | -0.02 | 0     | N/A  |
| mmu-miR-6907-5p  | 1324-1330 | 7mer-1A       | -0.1  | 64  | -0.02 | 0     | N/A  |
| mmu-miR-7021-3p  | 1326-1337 | non-canonical | N/A   | N/A | N/A   | 0     | N/A  |
| mmu-miR-7021-3p  | 1326-1337 | non-canonical | N/A   | N/A | N/A   | 0     | N/A  |
| mmu-miR-107-5p   | 1327-1333 | 7mer-1A       | -0.02 | 32  | 0     | 0.113 | N/A  |
| mmu-miR-103-2-5p | 1327-1333 | 7mer-1A       | -0.02 | 31  | 0     | 0.113 | N/A  |
| mmu-miR-103-1-5p | 1327-1333 | 7mer-1A       | -0.01 | 30  | 0     | 0.113 | N/A  |
| mmu-miR-7008-3p  | 1328-1335 | 8mer          | -0.2  | 87  | -0.04 | 0     | N/A  |
| mmu-miR-218-5p   | 1329-1335 | 7mer-m8       | -0.07 | 65  | -0.01 | 0.113 | <0.1 |
| mmu-miR-7002-3p  | 1329-1335 | 7mer-m8       | -0.04 | 55  | -0.01 | 0.113 | <0.1 |
| mmu-miR-7026-3p  | 1329-1335 | 7mer-1A       | -0.02 | 23  | 0     | 0     | N/A  |
| mmu-miR-6965-3p  | 1330-1337 | 8mer          | -0.21 | 90  | -0.04 | 0     | N/A  |
| mmu-miR-7043-3p  | 1331-1337 | 7mer-1A       | -0.11 | 73  | -0.02 | 0.445 | N/A  |
| mmu-miR-7015-5p  | 1331-1337 | 7mer-1A       | -0.13 | 73  | -0.02 | 0     | N/A  |
| mmu-miR-6950-3p  | 1335-1341 | 7mer-m8       | -0.07 | 62  | -0.01 | 0     | N/A  |
| mmu-miR-7215-3p  | 1338-1344 | 7mer-1A       | -0.14 | 81  | -0.03 | 0     | N/A  |
| mmu-miR-7030-3p  | 1339-1345 | 7mer-m8       | -0.03 | 41  | -0.01 | 0     | N/A  |
| mmu-miR-206-5p   | 1344-1350 | 7mer-m8       | -0.02 | 33  | 0     | 0     | N/A  |
| mmu-miR-338-3p   | 1348-1354 | 7mer-m8       | -0.02 | 46  | 0     | 0     | <0.1 |
| mmu-miR-1934-5p  | 1368-1374 | 7mer-m8       | -0.25 | 87  | -0.05 | 0     | N/A  |
| mmu-miR-6372     | 1371-1377 | 7mer-m8       | -0.14 | 76  | -0.03 | 0     | N/A  |
| mmu-miR-1912-3p  | 1374-1380 | 7mer-m8       | -0.02 | 67  | 0     | 0     | N/A  |
| mmu-miR-6902-5p  | 1379-1385 | 7mer-m8       | -0.06 | 72  | -0.01 | 0     | N/A  |
| mmu-miR-6918-3p  | 1385-1391 | 7mer-1A       | -0.03 | 30  | -0.01 | 0     | N/A  |
| mmu-miR-28a-3p   | 1391-1397 | 7mer-m8       | -0.02 | 28  | 0     | 0     | N/A  |
| mmu-miR-3068-5p  | 1406-1412 | 7mer-m8       | -0.05 | 56  | -0.01 | 0     | N/A  |
| mmu-miR-6934-5p  | 1409-1415 | 7mer-m8       | -0.15 | 77  | -0.03 | 0     | N/A  |
| mmu-miR-7672-5p  | 1409-1415 | 7mer-1A       | -0.07 | 58  | -0.01 | 0     | N/A  |
| mmu-miR-6910-3p  | 1412-1418 | 7mer-1A       | -0.02 | 35  | 0     | 0     | N/A  |

|                 |           |         |       |    |       |       |      |
|-----------------|-----------|---------|-------|----|-------|-------|------|
| mmu-miR-6910-5p | 1420-1426 | 7mer-1A | -0.2  | 76 | -0.04 | 0     | N/A  |
| mmu-miR-7006-5p | 1420-1426 | 7mer-1A | -0.12 | 37 | -0.02 | 0     | N/A  |
| mmu-miR-5132-5p | 1422-1428 | 7mer-m8 | -0.26 | 84 | -0.05 | 0     | N/A  |
| mmu-miR-8110    | 1424-1430 | 7mer-m8 | -0.31 | 87 | -0.06 | 0     | N/A  |
| mmu-miR-28a-3p  | 1434-1440 | 7mer-m8 | -0.09 | 76 | -0.02 | 0.569 | N/A  |
| mmu-miR-708-3p  | 1435-1441 | 7mer-m8 | -0.05 | 52 | -0.01 | 0     | N/A  |
| mmu-miR-350-3p  | 1440-1446 | 7mer-1A | -0.01 | 18 | 0     | 0     | N/A  |
| mmu-miR-677-3p  | 1447-1453 | 7mer-m8 | -0.02 | 53 | 0     | 0     | N/A  |
| mmu-miR-133a-5p | 1460-1466 | 7mer-m8 | -0.02 | 21 | 0     | 0     | N/A  |
| mmu-miR-138-5p  | 1462-1468 | 7mer-1A | -0.11 | 53 | -0.02 | 0.819 | <0.1 |
| mmu-miR-6926-3p | 1468-1474 | 7mer-1A | -0.01 | 35 | 0     | 0     | N/A  |
| mmu-miR-1193-3p | 1471-1477 | 7mer-m8 | -0.11 | 76 | -0.02 | 0.605 | N/A  |
| mmu-miR-370-5p  | 1471-1477 | 7mer-m8 | -0.12 | 76 | -0.02 | 0.605 | N/A  |
| mmu-miR-6904-3p | 1479-1485 | 7mer-m8 | -0.12 | 76 | -0.02 | 0     | N/A  |
| mmu-miR-5619-5p | 1488-1494 | 7mer-1A | -0.19 | 86 | -0.04 | 0     | N/A  |
| mmu-miR-668-3p  | 1488-1494 | 7mer-1A | -0.05 | 64 | -0.01 | 0.72  | N/A  |
| mmu-miR-7215-5p | 1499-1505 | 7mer-m8 | -0.02 | 53 | 0     | 0     | N/A  |
| mmu-miR-344h-3p | 1508-1514 | 7mer-m8 | -0.02 | 74 | 0     | 0     | N/A  |
| mmu-miR-6910-3p | 1513-1519 | 7mer-1A | -0.11 | 79 | -0.02 | 0     | N/A  |
| mmu-miR-1264-5p | 1535-1541 | 7mer-1A | -0.04 | 38 | -0.01 | 0     | N/A  |
| mmu-miR-1934-5p | 1536-1542 | 7mer-m8 | -0.16 | 75 | -0.03 | 0     | N/A  |
| mmu-miR-763     | 1539-1545 | 7mer-m8 | -0.02 | 51 | 0     | 0     | N/A  |
| mmu-miR-1955-5p | 1543-1549 | 7mer-m8 | -0.04 | 33 | -0.01 | 0     | N/A  |
| mmu-miR-6350    | 1548-1554 | 7mer-m8 | -0.02 | 35 | 0     | 0     | N/A  |
| mmu-miR-6346    | 1548-1554 | 7mer-m8 | -0.02 | 29 | 0     | 0     | N/A  |
| mmu-miR-761     | 1549-1555 | 7mer-m8 | -0.02 | 55 | 0     | 0.113 | N/A  |
| mmu-miR-214-3p  | 1549-1555 | 7mer-m8 | -0.02 | 41 | 0     | 0.113 | N/A  |
| mmu-miR-383-3p  | 1551-1557 | 7mer-m8 | -0.02 | 24 | 0     | 0.113 | N/A  |
| mmu-miR-9769-5p | 1553-1560 | 8mer    | -0.06 | 47 | -0.01 | 0     | N/A  |

|                  |           |               |       |     |       |       |      |
|------------------|-----------|---------------|-------|-----|-------|-------|------|
| mmu-miR-871-3p   | 1557-1563 | 7mer-m8       | -0.08 | 62  | -0.02 | 0     | N/A  |
| mmu-miR-7222-3p  | 1561-1567 | 7mer-m8       | -0.19 | 90  | -0.04 | 0     | N/A  |
| mmu-miR-3090-3p  | 1563-1569 | 7mer-1A       | -0.03 | 56  | -0.01 | 0     | N/A  |
| mmu-miR-3096-5p  | 1573-1579 | 7mer-m8       | -0.07 | 55  | -0.01 | 0     | N/A  |
| mmu-miR-486a-3p  | 1584-1590 | 7mer-1A       | -0.11 | 48  | -0.02 | 0     | N/A  |
| mmu-miR-486b-3p  | 1584-1590 | 7mer-1A       | -0.11 | 48  | -0.02 | 0     | N/A  |
| mmu-miR-6954-5p  | 1584-1590 | 7mer-1A       | -0.09 | 44  | -0.02 | 0     | N/A  |
| mmu-miR-326-5p   | 1584-1590 | 7mer-1A       | -0.05 | 42  | -0.01 | 0     | N/A  |
| mmu-miR-5120     | 1585-1591 | 7mer-m8       | -0.23 | 90  | -0.04 | 0     | N/A  |
| mmu-miR-5710     | 1587-1593 | 7mer-1A       | -0.05 | 47  | -0.01 | 0     | N/A  |
| mmu-miR-692      | 1590-1596 | 7mer-1A       | -0.04 | 68  | -0.01 | 0     | N/A  |
| mmu-miR-6896-3p  | 1591-1597 | 7mer-1A       | -0.01 | 39  | 0     | 0     | N/A  |
| mmu-miR-6240     | 1598-1604 | 7mer-m8       | -0.04 | 54  | -0.01 | 0.253 | N/A  |
| mmu-miR-330-3p.1 | 1598-1604 | 7mer-m8       | -0.02 | 38  | 0     | 0.253 | N/A  |
| mmu-miR-218-5p   | 1610-1616 | 7mer-m8       | -0.02 | 35  | 0     | 1.818 | <0.1 |
| mmu-miR-7002-3p  | 1610-1616 | 7mer-m8       | -0.02 | 34  | 0     | 1.818 | <0.1 |
| mmu-miR-7008-3p  | 1610-1616 | 7mer-1A       | -0.01 | 21  | 0     | 0     | N/A  |
| mmu-miR-7026-3p  | 1610-1616 | 7mer-1A       | -0.01 | 14  | 0     | 0     | N/A  |
| mmu-miR-6965-3p  | 1611-1617 | 7mer-m8       | -0.02 | 37  | 0     | 0.729 | N/A  |
| mmu-miR-339-5p   | 1614-1620 | 7mer-1A       | -0.01 | 27  | 0     | 0.113 | N/A  |
| mmu-miR-7665-3p  | 1614-1625 | non-canonical | N/A   | N/A | N/A   | 0     | N/A  |
| mmu-miR-7665-3p  | 1614-1625 | non-canonical | N/A   | N/A | N/A   | 0     | N/A  |
| mmu-miR-8118     | 1623-1629 | 7mer-m8       | -0.02 | 37  | 0     | 0     | N/A  |
| mmu-miR-1955-5p  | 1632-1639 | 8mer          | -0.28 | 92  | -0.05 | 0     | N/A  |
| mmu-miR-219b-5p  | 1635-1641 | 7mer-m8       | -0.19 | 82  | -0.04 | 0.468 | N/A  |
| mmu-miR-1942     | 1637-1643 | 7mer-m8       | -0.02 | 50  | 0     | 0     | N/A  |
| mmu-miR-7229-3p  | 1640-1646 | 7mer-m8       | -0.02 | 45  | 0     | 0     | N/A  |
| mmu-miR-672-3p   | 1641-1647 | 7mer-m8       | -0.11 | 88  | -0.02 | 0.113 | N/A  |
| mmu-miR-669c-3p  | 1642-1649 | 8mer          | -0.08 | 56  | -0.02 | 0     | N/A  |

|                 |           |         |       |    |       |       |      |
|-----------------|-----------|---------|-------|----|-------|-------|------|
| mmu-miR-466i-3p | 1643-1650 | 8mer    | -0.18 | 89 | -0.03 | 0     | N/A  |
| mmu-miR-362-3p  | 1643-1649 | 7mer-1A | -0.04 | 76 | -0.01 | 0.113 | N/A  |
| mmu-miR-329-3p  | 1643-1649 | 7mer-1A | -0.03 | 69 | -0.01 | 0.113 | N/A  |
| mmu-miR-654-3p  | 1657-1663 | 7mer-m8 | -0.16 | 86 | -0.03 | 0.707 | N/A  |
| mmu-miR-6381    | 1674-1680 | 7mer-m8 | -0.15 | 82 | -0.03 | 0     | N/A  |
| mmu-miR-6924-5p | 1675-1681 | 7mer-m8 | -0.02 | 16 | 0     | 0     | N/A  |
| mmu-miR-7011-5p | 1676-1682 | 7mer-m8 | -0.05 | 50 | -0.01 | 0     | N/A  |
| mmu-miR-6942-5p | 1677-1683 | 7mer-m8 | -0.06 | 54 | -0.01 | 0     | N/A  |
| mmu-miR-6916-5p | 1677-1683 | 7mer-m8 | -0.05 | 47 | -0.01 | 0     | N/A  |
| mmu-miR-6952-3p | 1684-1690 | 7mer-m8 | -0.04 | 68 | -0.01 | 0     | N/A  |
| mmu-miR-301b-5p | 1684-1690 | 7mer-m8 | -0.02 | 65 | 0     | 0     | N/A  |
| mmu-miR-301a-5p | 1684-1690 | 7mer-m8 | -0.02 | 65 | 0     | 0     | N/A  |
| mmu-miR-7084-3p | 1685-1691 | 7mer-m8 | -0.02 | 37 | 0     | 0     | N/A  |
| mmu-miR-7074-3p | 1689-1695 | 7mer-1A | -0.03 | 42 | -0.01 | 0     | N/A  |
| mmu-miR-6924-5p | 1696-1702 | 7mer-1A | -0.08 | 48 | -0.02 | 0     | N/A  |
| mmu-miR-1967    | 1696-1702 | 7mer-1A | -0.01 | 23 | 0     | 0     | N/A  |
| mmu-miR-6985-5p | 1698-1704 | 7mer-m8 | -0.24 | 93 | -0.04 | 0     | N/A  |
| mmu-miR-1936    | 1703-1709 | 7mer-m8 | -0.15 | 89 | -0.03 | 0     | N/A  |
| mmu-miR-493-5p  | 1711-1717 | 7mer-m8 | -0.06 | 76 | -0.01 | 0     | N/A  |
| mmu-let-7g-3p   | 1712-1718 | 7mer-m8 | -0.2  | 82 | -0.04 | 0     | N/A  |
| mmu-miR-7224-3p | 1716-1722 | 7mer-1A | -0.14 | 83 | -0.03 | 0     | N/A  |
| mmu-miR-6974-3p | 1717-1723 | 7mer-m8 | -0.11 | 76 | -0.02 | 0     | N/A  |
| mmu-miR-7671-5p | 1720-1726 | 7mer-1A | -0.2  | 85 | -0.04 | 0     | N/A  |
| mmu-miR-7029-3p | 1721-1728 | 8mer    | -0.33 | 95 | -0.06 | 0.113 | N/A  |
| mmu-miR-7091-3p | 1722-1728 | 7mer-1A | -0.15 | 78 | -0.03 | 0     | N/A  |
| mmu-miR-6902-3p | 1725-1731 | 7mer-1A | -0.07 | 62 | -0.01 | 0     | N/A  |
| mmu-miR-1933-5p | 1727-1733 | 7mer-1A | -0.14 | 69 | -0.03 | 0     | N/A  |
| mmu-miR-182-5p  | 1734-1740 | 7mer-m8 | -0.1  | 64 | -0.02 | 1.653 | 0.14 |
| mmu-miR-664-5p  | 1759-1765 | 7mer-1A | -0.11 | 72 | -0.02 | 0     | N/A  |



|                 |           |         |       |    |       |       |      |
|-----------------|-----------|---------|-------|----|-------|-------|------|
| mmu-miR-10b-3p  | 1786-1792 | 7mer-1A | -0.19 | 93 | -0.04 | 0     | N/A  |
| mmu-miR-7221-3p | 1793-1799 | 7mer-1A | -0.09 | 56 | -0.02 | 0     | N/A  |
| mmu-miR-468-3p  | 1794-1800 | 7mer-m8 | -0.09 | 75 | -0.02 | 0     | N/A  |
| mmu-miR-7048-3p | 1799-1805 | 7mer-m8 | -0.05 | 70 | -0.01 | 0     | N/A  |
| mmu-miR-7077-3p | 1799-1805 | 7mer-m8 | -0.05 | 67 | -0.01 | 0     | N/A  |
| mmu-miR-1224-5p | 1805-1811 | 7mer-m8 | -0.14 | 89 | -0.03 | 0.113 | N/A  |
| mmu-miR-7026-5p | 1808-1814 | 7mer-1A | -0.05 | 56 | -0.01 | 0     | N/A  |
| mmu-miR-7079-3p | 1811-1817 | 7mer-m8 | -0.16 | 81 | -0.03 | 0     | N/A  |
| mmu-miR-208b-3p | 1827-1833 | 7mer-1A | -0.11 | 77 | -0.02 | 0.264 | <0.1 |
| mmu-miR-208a-3p | 1827-1833 | 7mer-1A | -0.1  | 75 | -0.02 | 0.264 | <0.1 |
| mmu-miR-499-5p  | 1827-1833 | 7mer-1A | -0.04 | 50 | -0.01 | 0.264 | <0.1 |
| mmu-miR-3066-3p | 1830-1836 | 7mer-1A | -0.01 | 43 | 0     | 0     | N/A  |
| mmu-miR-1a-2-5p | 1832-1839 | 8mer    | -0.27 | 96 | -0.05 | 0     | <0.1 |
| mmu-miR-1a-1-5p | 1832-1839 | 8mer    | -0.27 | 95 | -0.05 | 0     | <0.1 |
| mmu-miR-485-3p  | 1834-1840 | 7mer-1A | -0.1  | 75 | -0.02 | 0     | N/A  |
| mmu-miR-205-5p  | 1836-1842 | 7mer-m8 | -0.19 | 93 | -0.04 | 0.113 | <0.1 |
| mmu-miR-703     | 1839-1845 | 7mer-m8 | -0.1  | 87 | -0.02 | 0     | N/A  |
| mmu-miR-7062-5p | 1854-1860 | 7mer-m8 | -0.37 | 96 | -0.07 | 0     | N/A  |
| mmu-miR-764-3p  | 1855-1861 | 7mer-m8 | -0.2  | 93 | -0.04 | 0.113 | N/A  |
| mmu-miR-5110    | 1856-1862 | 7mer-m8 | -0.16 | 84 | -0.03 | 0     | N/A  |
| mmu-miR-7081-5p | 1856-1862 | 7mer-m8 | -0.19 | 81 | -0.03 | 0     | N/A  |
| mmu-miR-7086-5p | 1857-1863 | 7mer-m8 | -0.18 | 89 | -0.03 | 0     | N/A  |
| mmu-miR-7661-5p | 1861-1867 | 7mer-m8 | -0.02 | 44 | 0     | 0     | N/A  |
| mmu-miR-539-5p  | 1863-1869 | 7mer-1A | -0.01 | 48 | 0     | 0.679 | N/A  |
| mmu-miR-706     | 1863-1869 | 7mer-1A | -0.01 | 45 | 0     | 0     | N/A  |
| mmu-miR-126a-5p | 1870-1876 | 7mer-1A | -0.07 | 84 | -0.01 | 0.789 | N/A  |
| mmu-miR-126b-5p | 1872-1878 | 7mer-1A | -0.01 | 38 | 0     | 0     | N/A  |
| mmu-miR-497a-3p | 1884-1890 | 7mer-1A | -0.09 | 87 | -0.02 | 0     | N/A  |
| mmu-miR-489-5p  | 1889-1895 | 7mer-1A | -0.17 | 83 | 0     | 0     | N/A  |

Note: miR, microRNA.
